# Supplementary material for: Photophysical properties of homobimetallic Cu(i)–Cu(i) and heterobimetallic Cu(i)–Ag(i) complexes of 2-(6-bromo-2-pyridyl)-1H-imidazo[4,5-f][1,10]phenanthroline
Source: Royal Society of Chemistry journal article supplement (doi:10.1039/d2nj00774f), 2022-01-01
Supplement: d2nj00774f1.pdf [file d2nj00774f1.pdf]

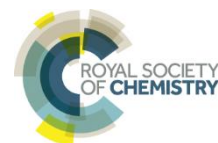

**New Journal of Chemistry**

**Photophysical properties of homobimetallic Cu(I)-Cu(I) and heterobimetallic Cu(I)-Ag(I) complexes of 2-(6-bromo-2-pyridyl)-1*H*-imidazo[4,5-*f*][1,10]phenanthroline**

Zhan Wu, Shu Cui, Zhenqin Zhao, Bingling He, Xiu-Ling Li\*

School of Chemistry and Materials Science, Jiangsu Normal University, Xuzhou, Jiangsu 221116, China

Table S1. Crystallographic data and select refinement details for complexes **1a**·4CH<sub>2</sub>Cl<sub>2</sub>, **2b**·2CH<sub>2</sub>Cl<sub>2</sub>·2CH<sub>3</sub>OH·2H<sub>2</sub>O, **1c**·4H<sub>2</sub>O and **2c**·4CH<sub>2</sub>Cl<sub>2</sub>

|                                         | <b>1a</b> ·4CH <sub>2</sub> Cl <sub>2</sub>                                                                      | <b>2b</b> ·2CH <sub>2</sub> Cl <sub>2</sub> ·2CH <sub>3</sub> OH·2H <sub>2</sub> O                               | <b>1c</b> ·4H <sub>2</sub> O                                                          | <b>2c</b> ·4CH <sub>2</sub> Cl <sub>2</sub>                                                         |
|-----------------------------------------|------------------------------------------------------------------------------------------------------------------|------------------------------------------------------------------------------------------------------------------|---------------------------------------------------------------------------------------|-----------------------------------------------------------------------------------------------------|
| Formula weight                          | C <sub>94</sub> H <sub>74</sub> BrCl <sub>10</sub> Cu <sub>2</sub> N <sub>5</sub> O <sub>10</sub> P <sub>4</sub> | C <sub>100</sub> H <sub>89</sub> BrCl <sub>5</sub> Cu <sub>2</sub> N <sub>5</sub> O <sub>10</sub> P <sub>4</sub> | C <sub>90</sub> H <sub>73</sub> AgBrClCuN <sub>5</sub> O <sub>10</sub> P <sub>4</sub> | C <sub>100</sub> H <sub>81</sub> AgBrCl <sub>9</sub> CuN <sub>5</sub> O <sub>6</sub> P <sub>4</sub> |
| T (K)                                   | 150(2)                                                                                                           | 150(2)                                                                                                           | 150(2)                                                                                | 150(2)                                                                                              |
| Wavelength (Å)                          | 0.71073                                                                                                          | 0.71073                                                                                                          | 0.71073                                                                               | 0.71073                                                                                             |
| Crystal system                          | triclinic                                                                                                        | monoclinic                                                                                                       | orthorhombic                                                                          | monoclinic                                                                                          |
| Space group                             | <i>P</i> -1                                                                                                      | <i>Pc</i>                                                                                                        | <i>P</i> 2 <sub>1</sub> 2 <sub>1</sub>                                                | <i>P</i> 2 <sub>1</sub> / <i>c</i>                                                                  |
| Unit cell dimensions                    |                                                                                                                  |                                                                                                                  |                                                                                       |                                                                                                     |
| a (Å)                                   | 15.5719(15)                                                                                                      | 13.8873(11)                                                                                                      | 13.8637(12)                                                                           | 18.887(4)                                                                                           |
| b (Å)                                   | 15.9403(15)                                                                                                      | 10.6708(8)                                                                                                       | 24.798(2)                                                                             | 18.800(4)                                                                                           |
| c (Å)                                   | 20.762(2)                                                                                                        | 31.655(2)                                                                                                        | 26.122(2)                                                                             | 27.414(6)                                                                                           |
| α (°)                                   | 82.0390(10)                                                                                                      | 90.00                                                                                                            | 90.00                                                                                 | 90.00                                                                                               |
| β (°)                                   | 70.3860(10)                                                                                                      | 96.5600(10)                                                                                                      | 90.00                                                                                 | 100.064(3)                                                                                          |
| γ (°)                                   | 83.2990(10)                                                                                                      | 90.00                                                                                                            | 90.00                                                                                 | 90.00                                                                                               |
| V (Å <sup>3</sup> )                     | 4794.2(8)                                                                                                        | 4660.2(6)                                                                                                        | 8980.5(13)                                                                            | 9584(4)                                                                                             |
| Z                                       | 2                                                                                                                | 2                                                                                                                | 4                                                                                     | 4                                                                                                   |
| D <sub>calc</sub> (Mg·m <sup>-3</sup> ) | 1.468                                                                                                            | 1.397                                                                                                            | 1.274                                                                                 | 1.485                                                                                               |
| μ (mm <sup>-1</sup> )                   | 1.265                                                                                                            | 1.155                                                                                                            | 1.052                                                                                 | 1.218                                                                                               |
| F(000)                                  | 2152                                                                                                             | 2008                                                                                                             | 3504                                                                                  | 3680                                                                                                |
| Reflections collected                   | 24403                                                                                                            | 22894                                                                                                            | 36196                                                                                 | 39931                                                                                               |
| Independent reflections                 | 16608                                                                                                            | 12211                                                                                                            | 11582                                                                                 | 13468                                                                                               |
| Reflections with I > 2σ(I)              | 13598                                                                                                            | 11457                                                                                                            | 10739                                                                                 | 9549                                                                                                |
| Data/restraints/parameters              | 16608/0/1054                                                                                                     | 12211/2/1109                                                                                                     | 11582/0/983                                                                           | 13468/0/1036                                                                                        |
| Goodness-of-fit (GOF) on F <sup>2</sup> | 1.044                                                                                                            | 1.053                                                                                                            | 1.038                                                                                 | 1.007                                                                                               |
| Final R indices [I > 2σ(I)]             | 0.0451                                                                                                           | 0.0275                                                                                                           | 0.0315                                                                                | 0.0440                                                                                              |
| wR <sub>2</sub> [I > 2σ(I)]             | 0.1194                                                                                                           | 0.0693                                                                                                           | 0.0707                                                                                | 0.0970                                                                                              |
| R indices (all data)                    | 0.0568                                                                                                           | 0.0304                                                                                                           | 0.0361                                                                                | 0.0714                                                                                              |
| wR <sub>2</sub> (all data)              | 0.1263                                                                                                           | 0.0703                                                                                                           | 0.0725                                                                                | 0.1071                                                                                              |

**Table S2.** Main bond lengths (Å) and angles (°) for complexes **1a** 4CH<sub>2</sub>Cl<sub>2</sub>, **2b** 2CH<sub>2</sub>Cl<sub>2</sub>·2CH<sub>3</sub>OH·2H<sub>2</sub>O, **1c**·4H<sub>2</sub>O and **2c** 4CH<sub>2</sub>Cl<sub>2</sub>

| <b>1a</b> 4CH <sub>2</sub> Cl <sub>2</sub>                                        |            |           |            |           |            |           |            |
|-----------------------------------------------------------------------------------|------------|-----------|------------|-----------|------------|-----------|------------|
| Cu1–N1                                                                            | 2.078(3)   | Cu1–N2    | 2.045(3)   | Cu1–P1    | 2.288(1)   | Cu1–P2    | 2.210 (1)  |
| C13–N3                                                                            | 1.363(4)   | C13–N4    | 1.324(4)   | Cu2–N4    | 2.061(3)   | Cu2–N5    | 2.213(3)   |
| Cu2–P3                                                                            | 2.287 (1)  | Cu2–P4    | 2.245(1)   | N1–Cu1–N2 | 81.25(10)  | N1–Cu1–P1 | 99.95(7)   |
| N1–Cu1–P2                                                                         | 133.74(8)  | N2–Cu1–P1 | 100.95(7)  | N2–Cu1–P2 | 118.20(7)  | P1–Cu1–P2 | 114.87(3)  |
| N4–Cu2–N5                                                                         | 79.06(10)  | N4–Cu2–P3 | 102.29(7)  | N4–Cu2–P4 | 118.51(8)  | N5–Cu2–P3 | 104.06(8)  |
| N5–Cu2–P4                                                                         | 123.26(8)  | P3–Cu2–P4 | 120.90(3)  |           |            |           |            |
| <b>2b</b> 2CH <sub>2</sub> Cl <sub>2</sub> ·2CH <sub>3</sub> OH·2H <sub>2</sub> O |            |           |            |           |            |           |            |
| Cu1–N1                                                                            | 2.069(3)   | Cu1–N2    | 2.067(3)   | Cu1–P1    | 2.222(1)   | Cu1–P2    | 2.256(1)   |
| C13–N3                                                                            | 1.361(5)   | C13–N4    | 1.348(5)   | Cu2–N4    | 2.044(3)   | Cu2–N5    | 2.178(3)   |
| Cu2–P3                                                                            | 2.247(1)   | Cu2–P4    | 2.278(1)   | N1–Cu1–N2 | 80.87(12)  | N1–Cu1–P1 | 113.64(9)  |
| N1–Cu1–P2                                                                         | 109.95(9)  | N2–Cu1–P1 | 125.80(10) | N2–Cu1–P2 | 103.00(9)  | P1–Cu1–P2 | 117.61(4)  |
| N4–Cu2–N5                                                                         | 79.79(12)  | N4–Cu2–P3 | 123.50(9)  | N4–Cu2–P4 | 106.77(10) | N5–Cu2–P3 | 114.65(9)  |
| N5–Cu2–P4                                                                         | 103.17(9)  | P3–Cu2–P4 | 120.33(4)  |           |            |           |            |
| <b>1c</b> ·4H <sub>2</sub> O                                                      |            |           |            |           |            |           |            |
| Cu1–N1                                                                            | 2.081(4)   | Cu1–N2    | 2.046(4)   | Cu1–P1    | 2.208(2)   | Cu1–P2    | 2.283(2)   |
| C13–N3                                                                            | 1.366(7)   | C13–N4    | 1.346(6)   | Ag1–N4    | 2.265(4)   | Ag1–N5    | 2.491(4)   |
| Ag1–P3                                                                            | 2.524(2)   | Ag1–P4    | 2.404(2)   | N1–Cu1–N2 | 80.98(16)  | N1–Cu1–P1 | 129.86(13) |
| N1–Cu1–P2                                                                         | 98.57(13)  | N2–Cu1–P1 | 120.66(14) | N2–Cu1–P2 | 105.36(14) | P1–Cu1–P2 | 114.96(6)  |
| N4–Ag1–N5                                                                         | 71.00(14)  | N4–Ag1–P3 | 103.28(12) | N4–Ag1–P4 | 128.78(12) | N5–Ag1–P3 | 93.96(11)  |
| N5–Ag1–P4                                                                         | 139.57(11) | P3–Ag1–P4 | 110.87(5)  |           |            |           |            |
| <b>2c</b> 4CH <sub>2</sub> Cl <sub>2</sub>                                        |            |           |            |           |            |           |            |
| Cu1–N1                                                                            | 2.039(3)   | Cu1–N2    | 2.102(3)   | Cu1–P1    | 2.244(1)   | Cu1–P2    | 2.237(1)   |
| C13–N3                                                                            | 1.341(5)   | C13–N4    | 1.358(5)   | Ag1–N4    | 2.264(3)   | Ag1–N5    | 2.477(3)   |

|           |            |           |            |           |            |           |            |
|-----------|------------|-----------|------------|-----------|------------|-----------|------------|
| Ag1-P3    | 2.469(1)   | Ag1-P4    | 2.443(1)   | N1-Cu1-N2 | 80.57(13)  | N1-Cu1-P1 | 119.06(10) |
| N1-Cu1-P2 | 118.32(10) | N2-Cu1-P1 | 107.43(10) | N2-Cu1-P2 | 111.60(10) | P1-Cu1-P2 | 113.90(5)  |
| N4-Ag1-N5 | 71.42(11)  | N4-Ag1-P3 | 117.29(8)  | N4-Ag1-P4 | 125.43(8)  | N5-Ag1-P3 | 106.74(8)  |
| N5-Ag1-P4 | 114.51(8)  | P3-Ag1-P4 | 112.28(4)  |           |            |           |            |

---

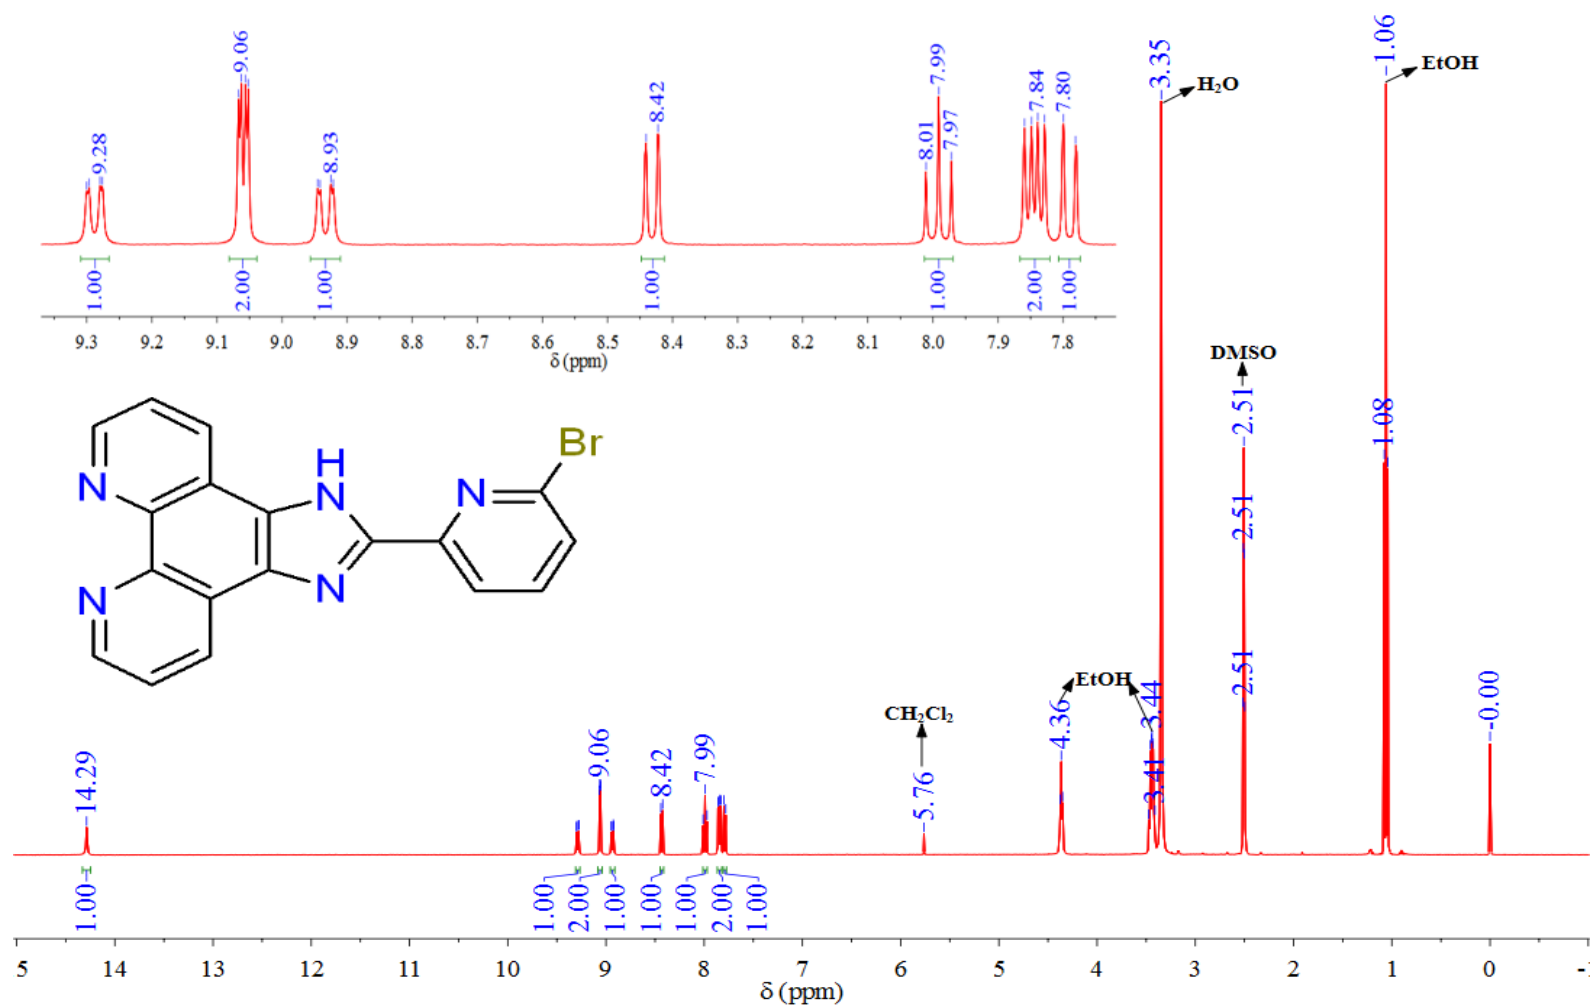Figure S1.  $^1\text{H}$  NMR of bippH in  $\text{DMSO-}d_6$

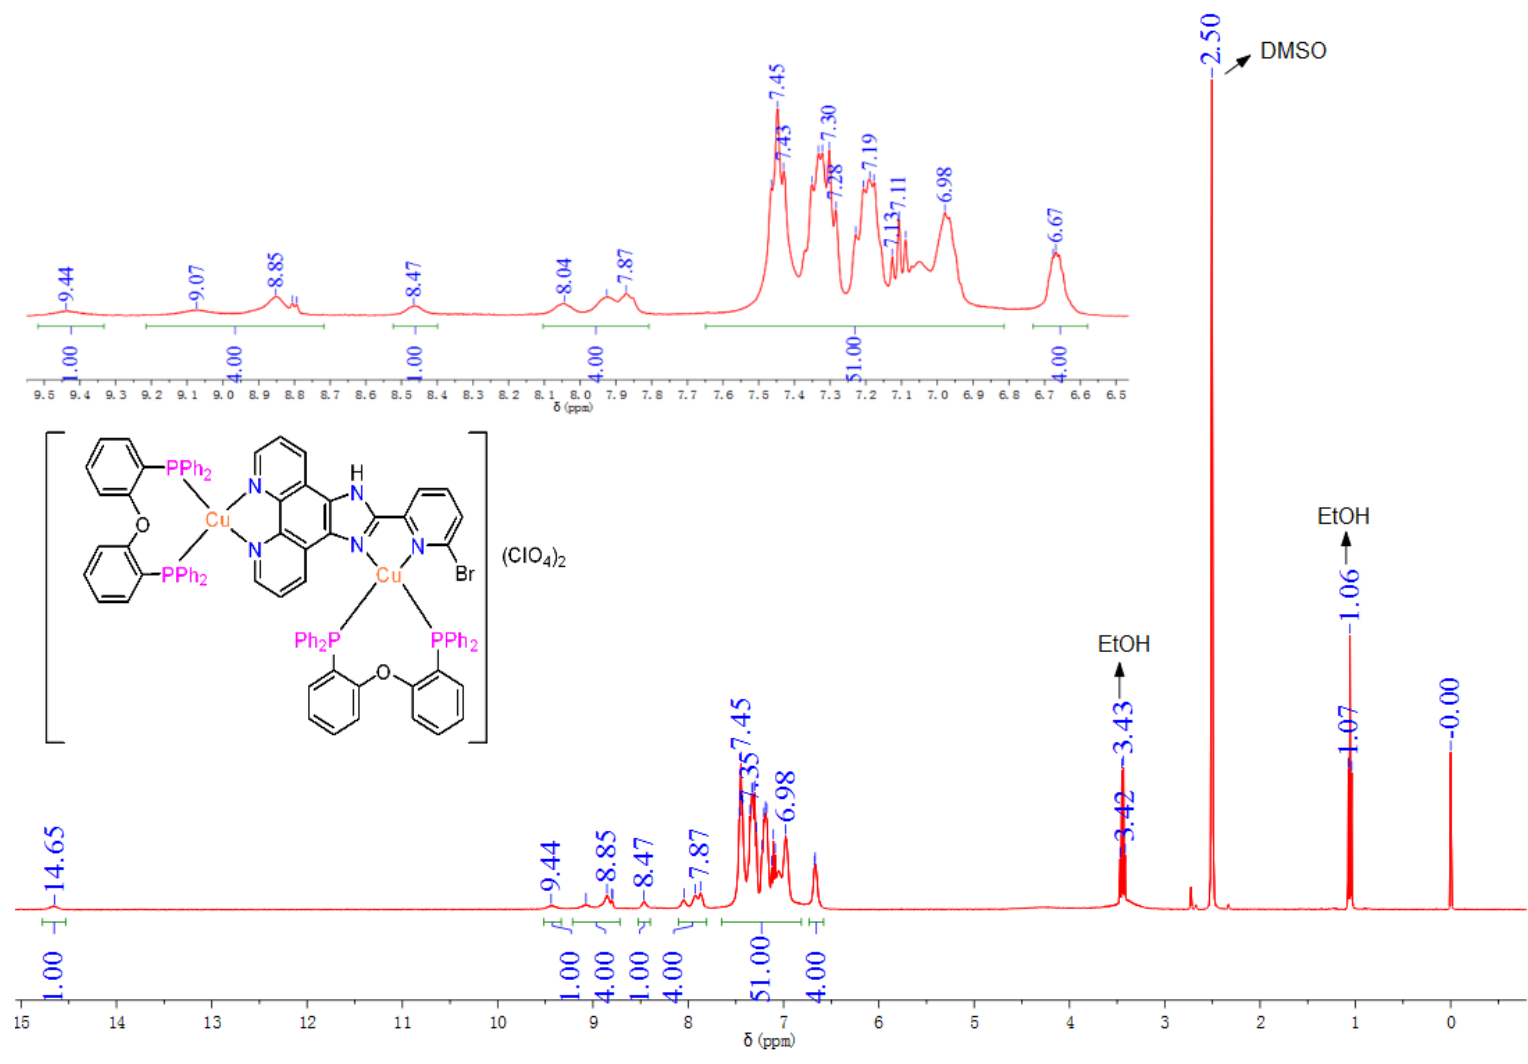

Figure S2. <sup>1</sup>H NMR of complex **1a** in DMSO-*d*<sub>6</sub>

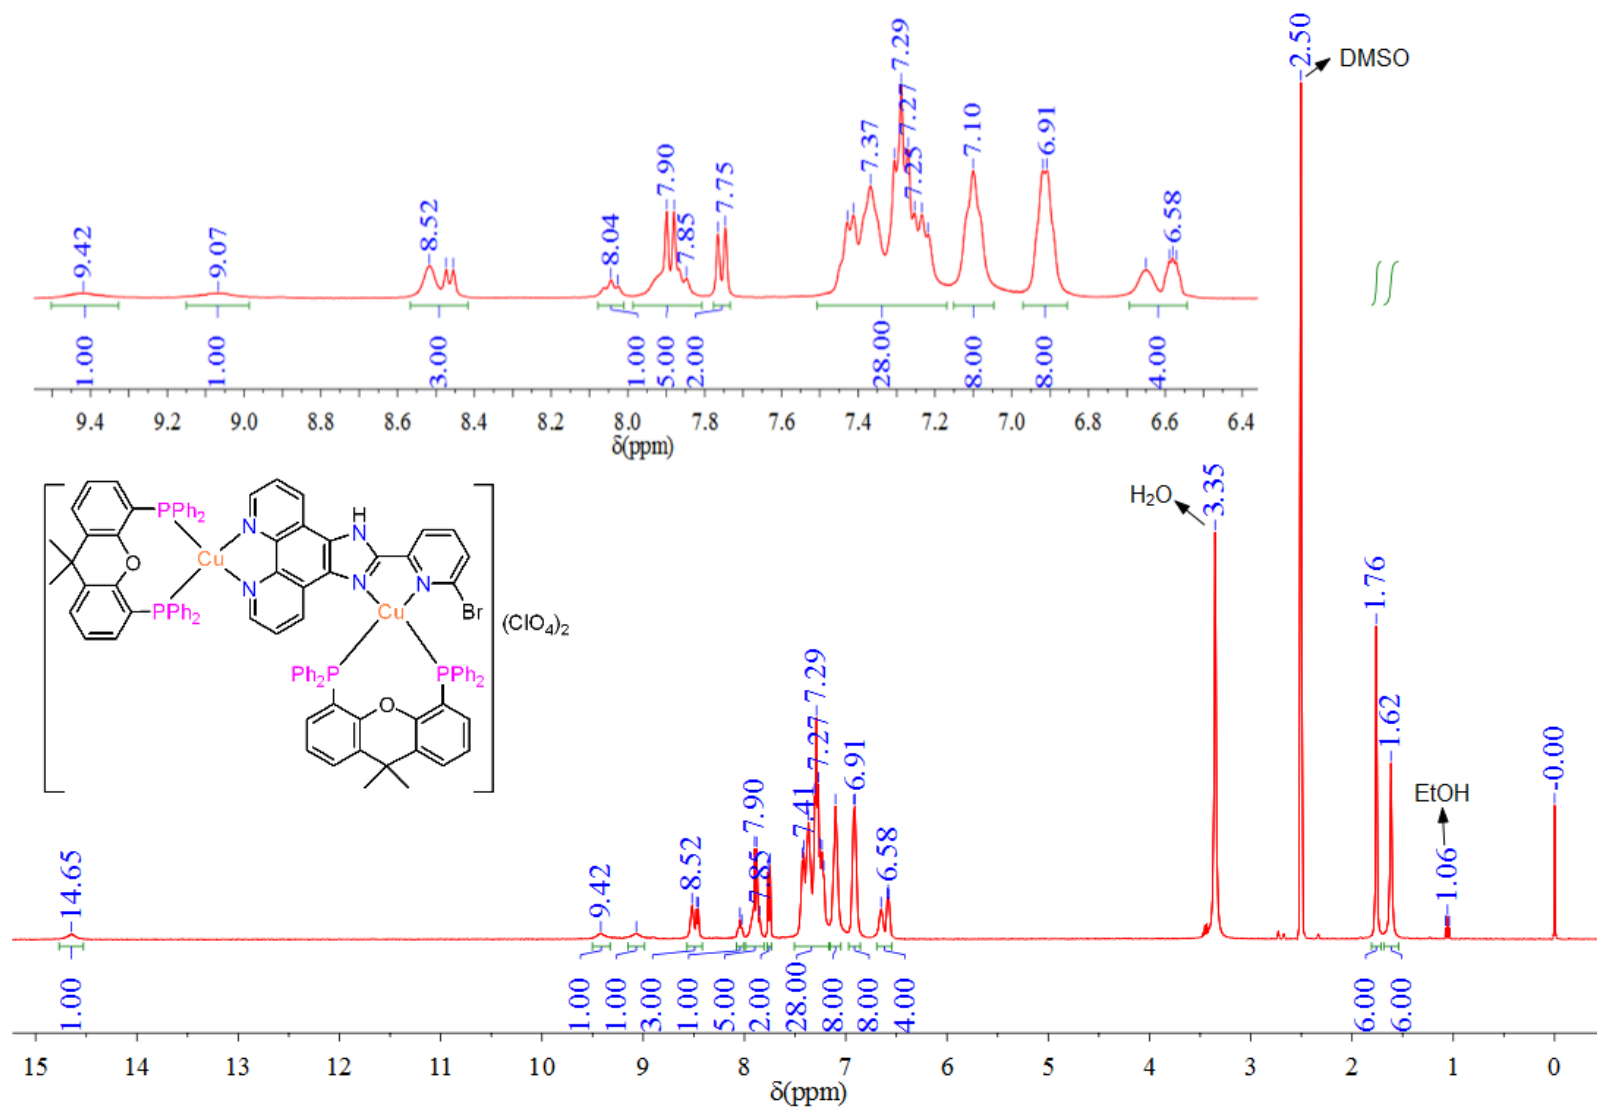Figure S3.  $^1\text{H}$  NMR of complex **2a** in  $\text{DMSO-}d_6$

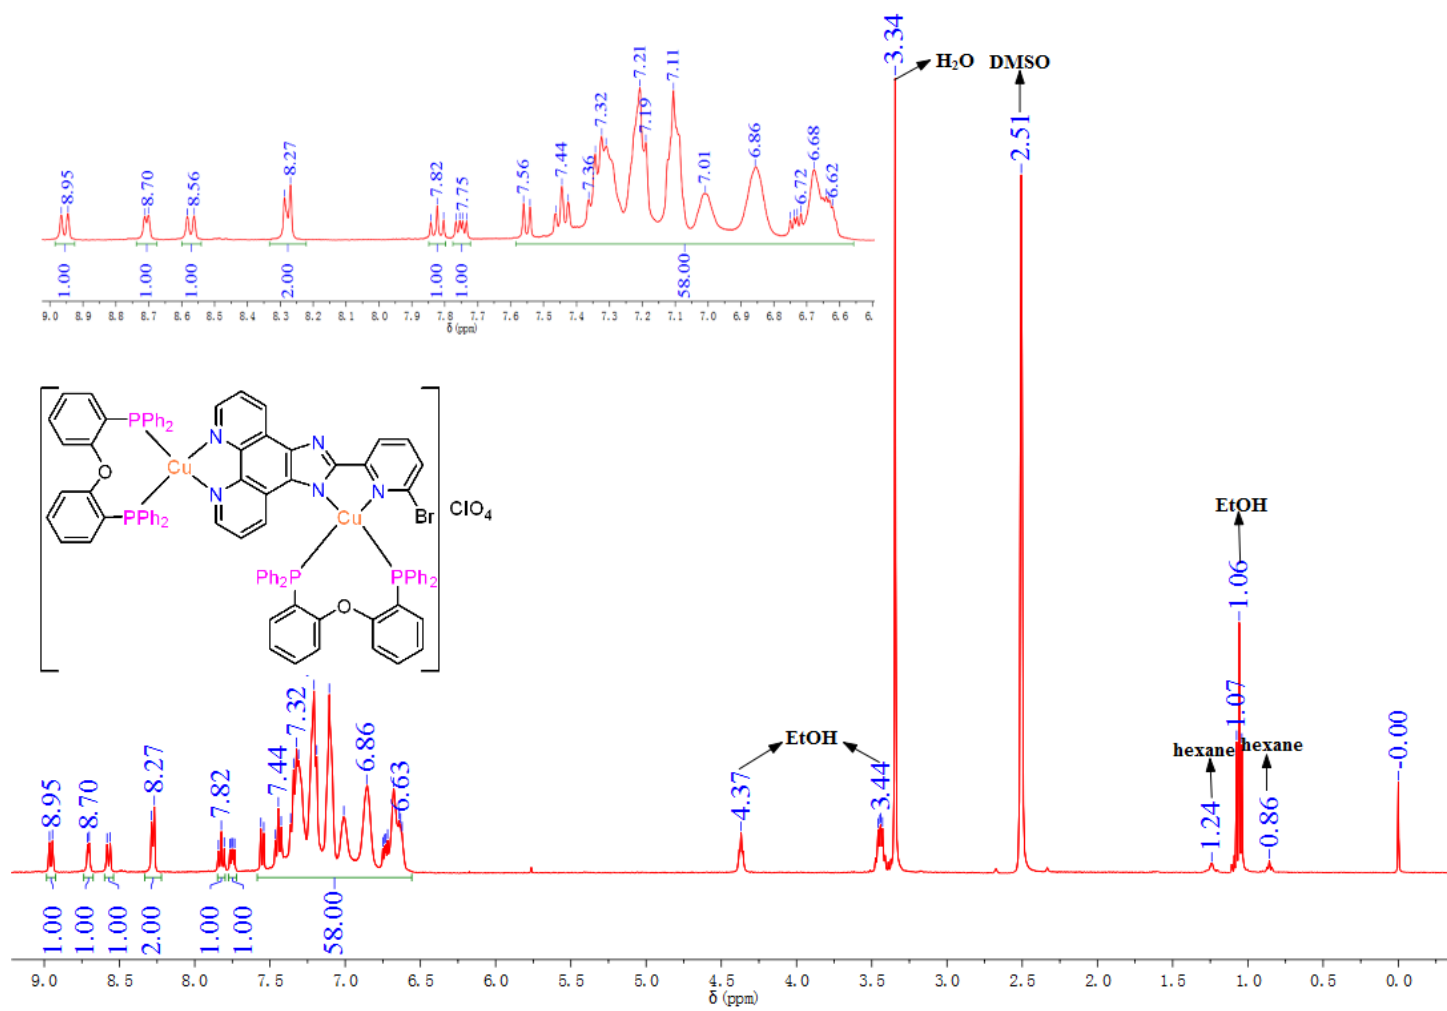

Figure S4.  $^1\text{H}$  NMR of complex **1b** in  $\text{DMSO-}d_6$



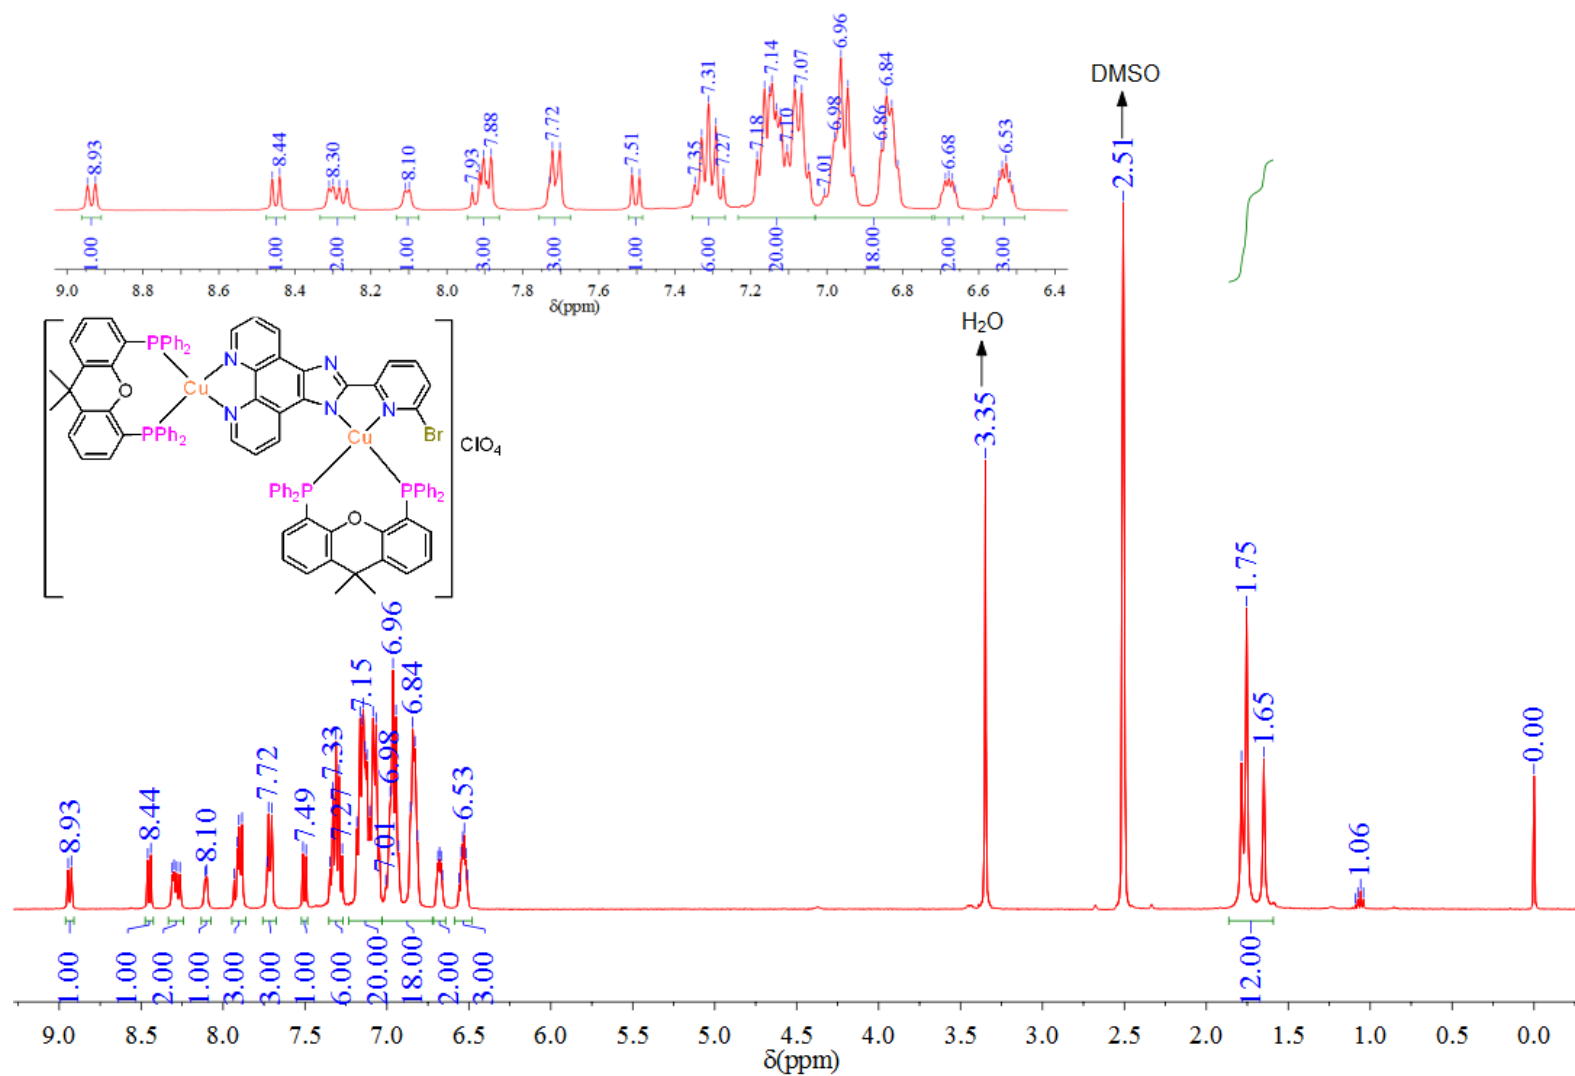Figure S5.  $^1\text{H}$  NMR of complex **2b** in  $\text{DMSO-}d_6$

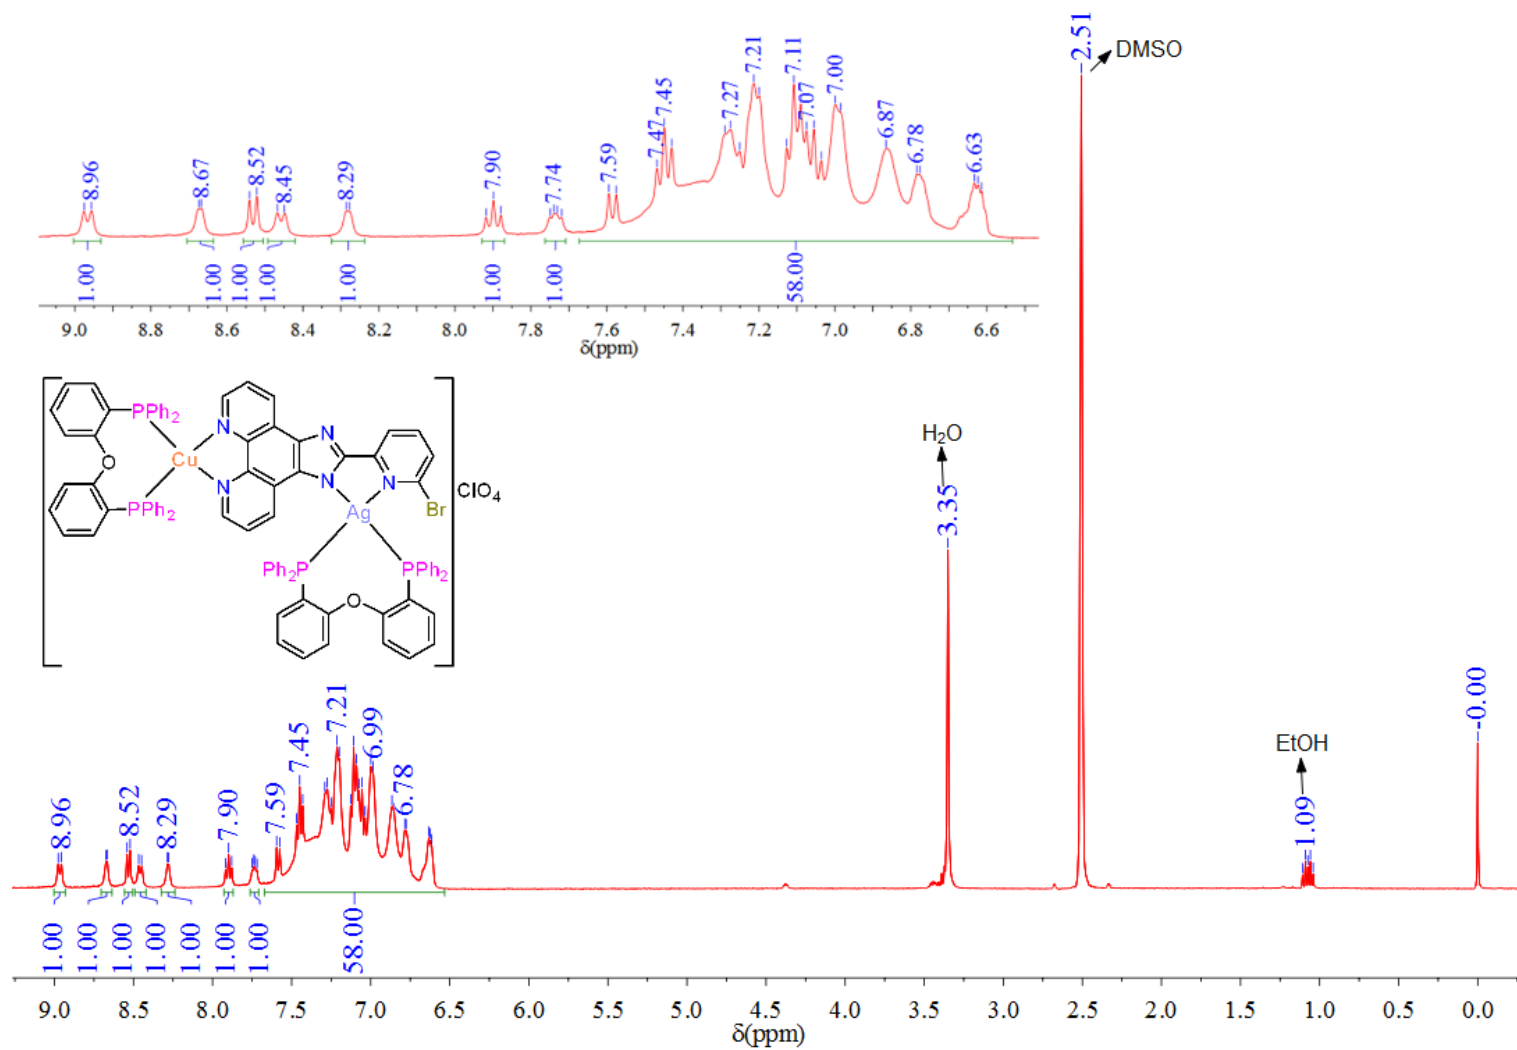

Figure S6.  $^1\text{H}$  NMR of complex **1c** in  $\text{DMSO-}d_6$

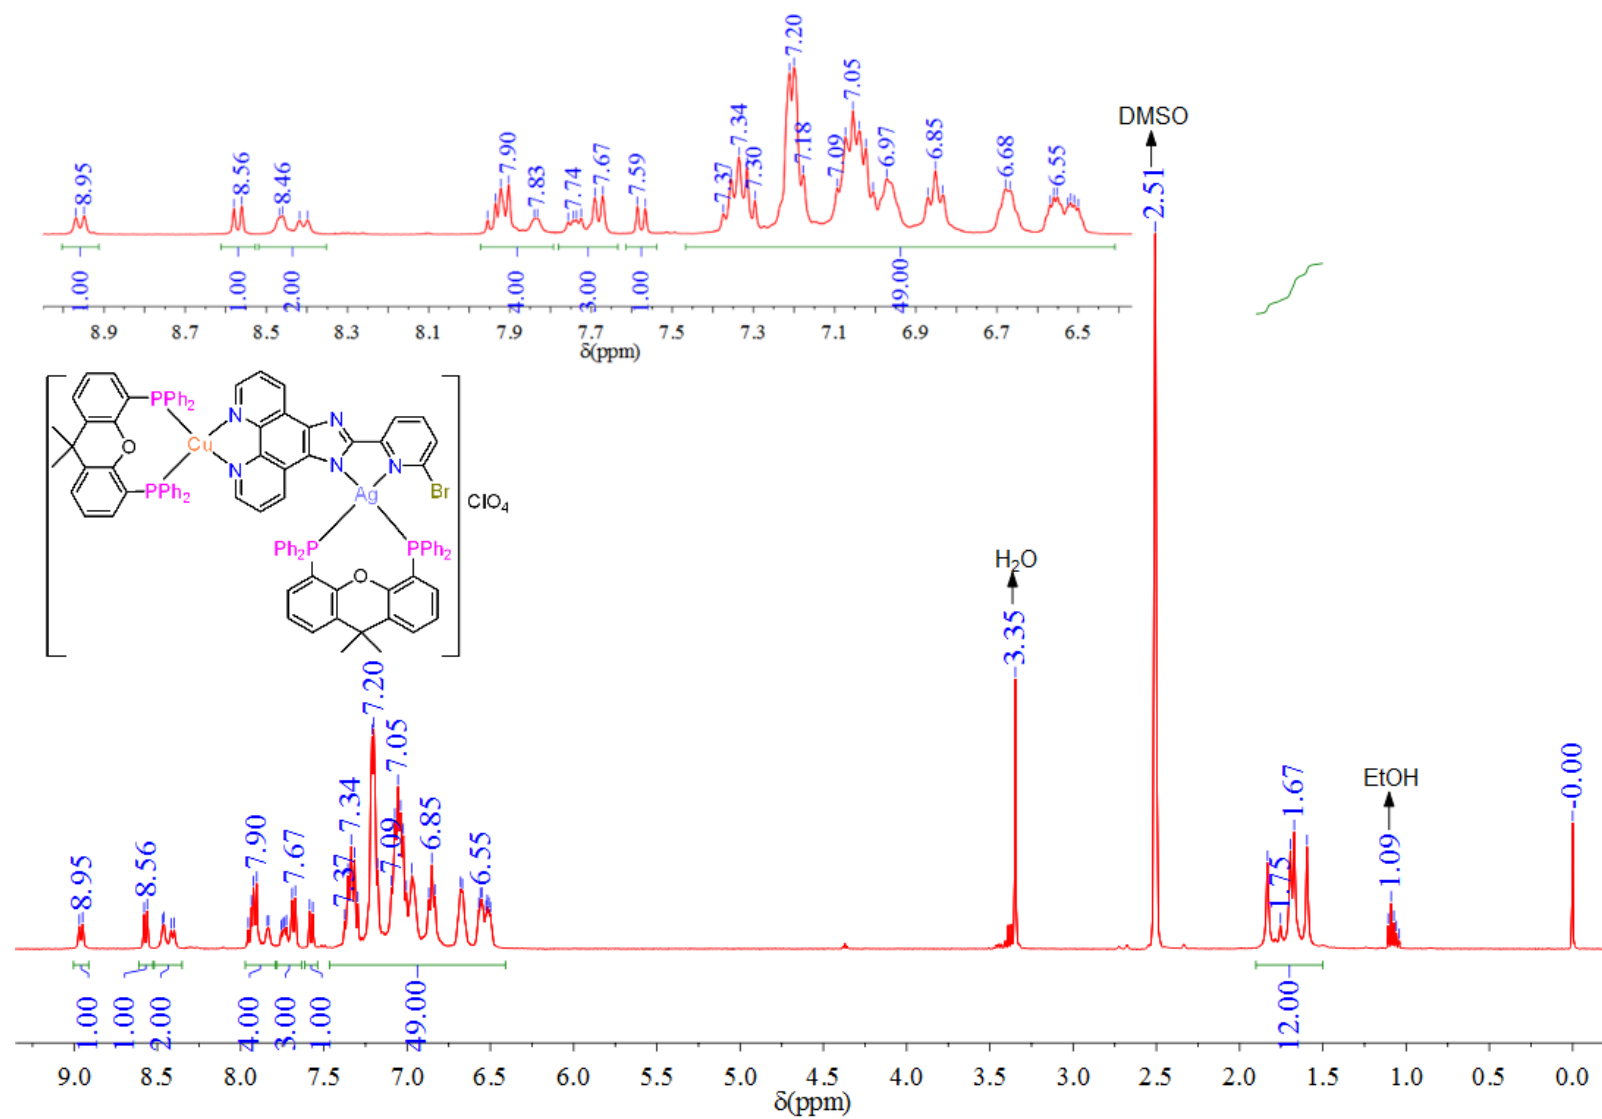Figure S7.  $^1\text{H}$  NMR of complex **2c** in  $\text{DMSO-}d_6$

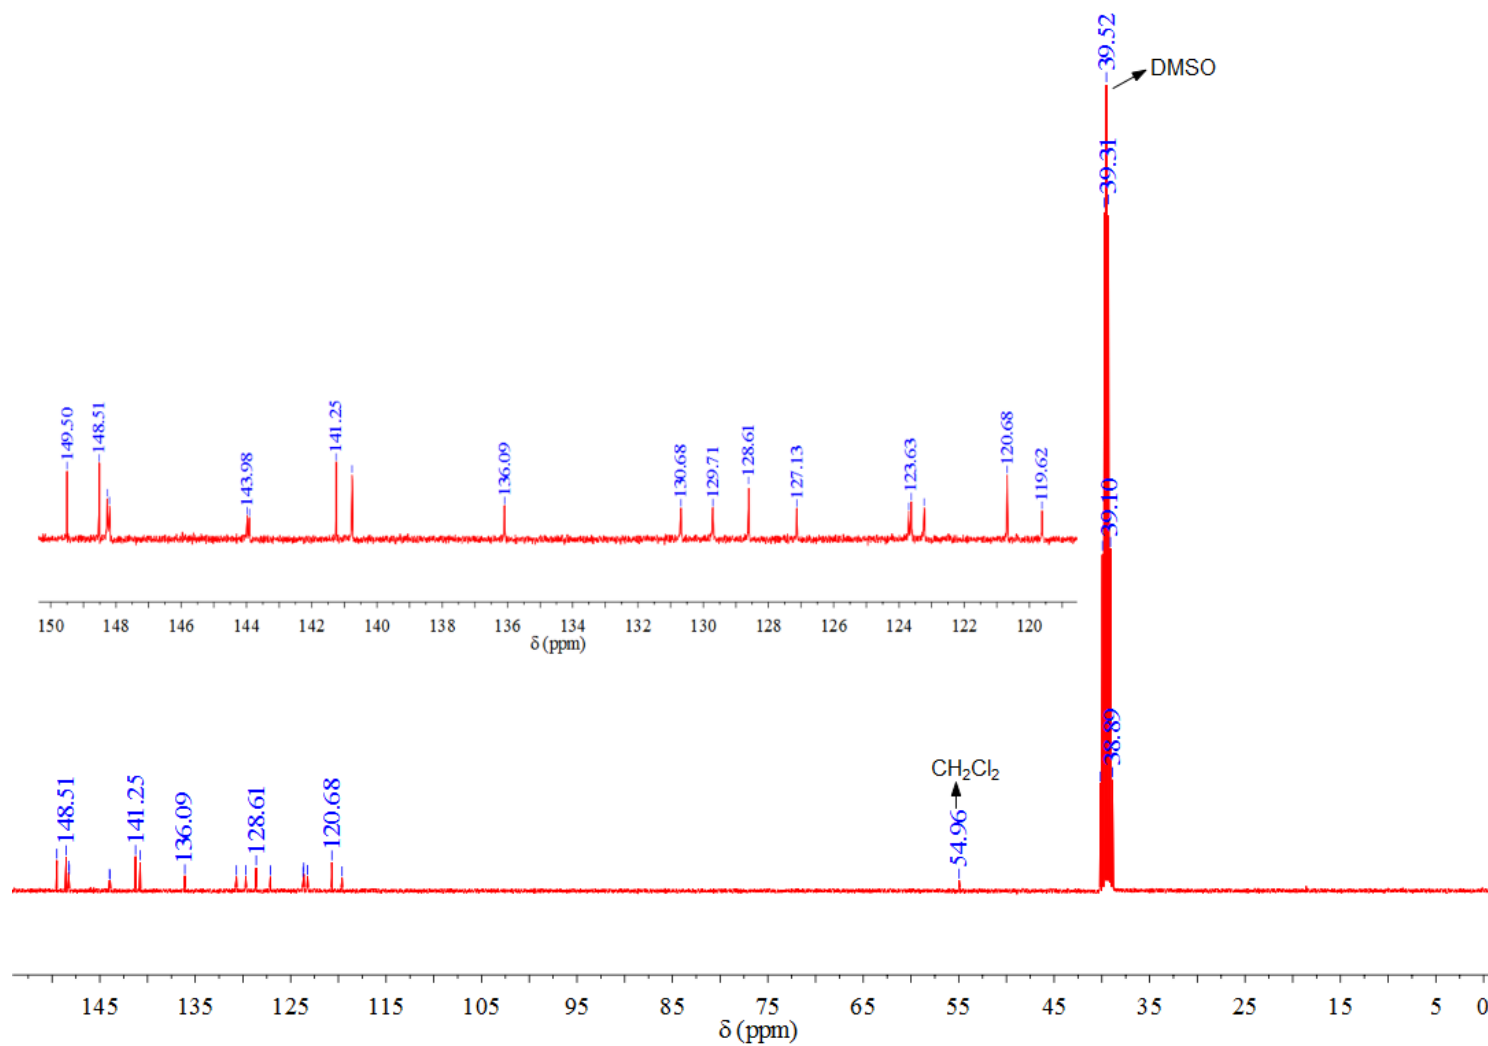

Figure S8.  $^{13}\text{C}$  NMR of bpiPH in  $\text{DMSO-}d_6$

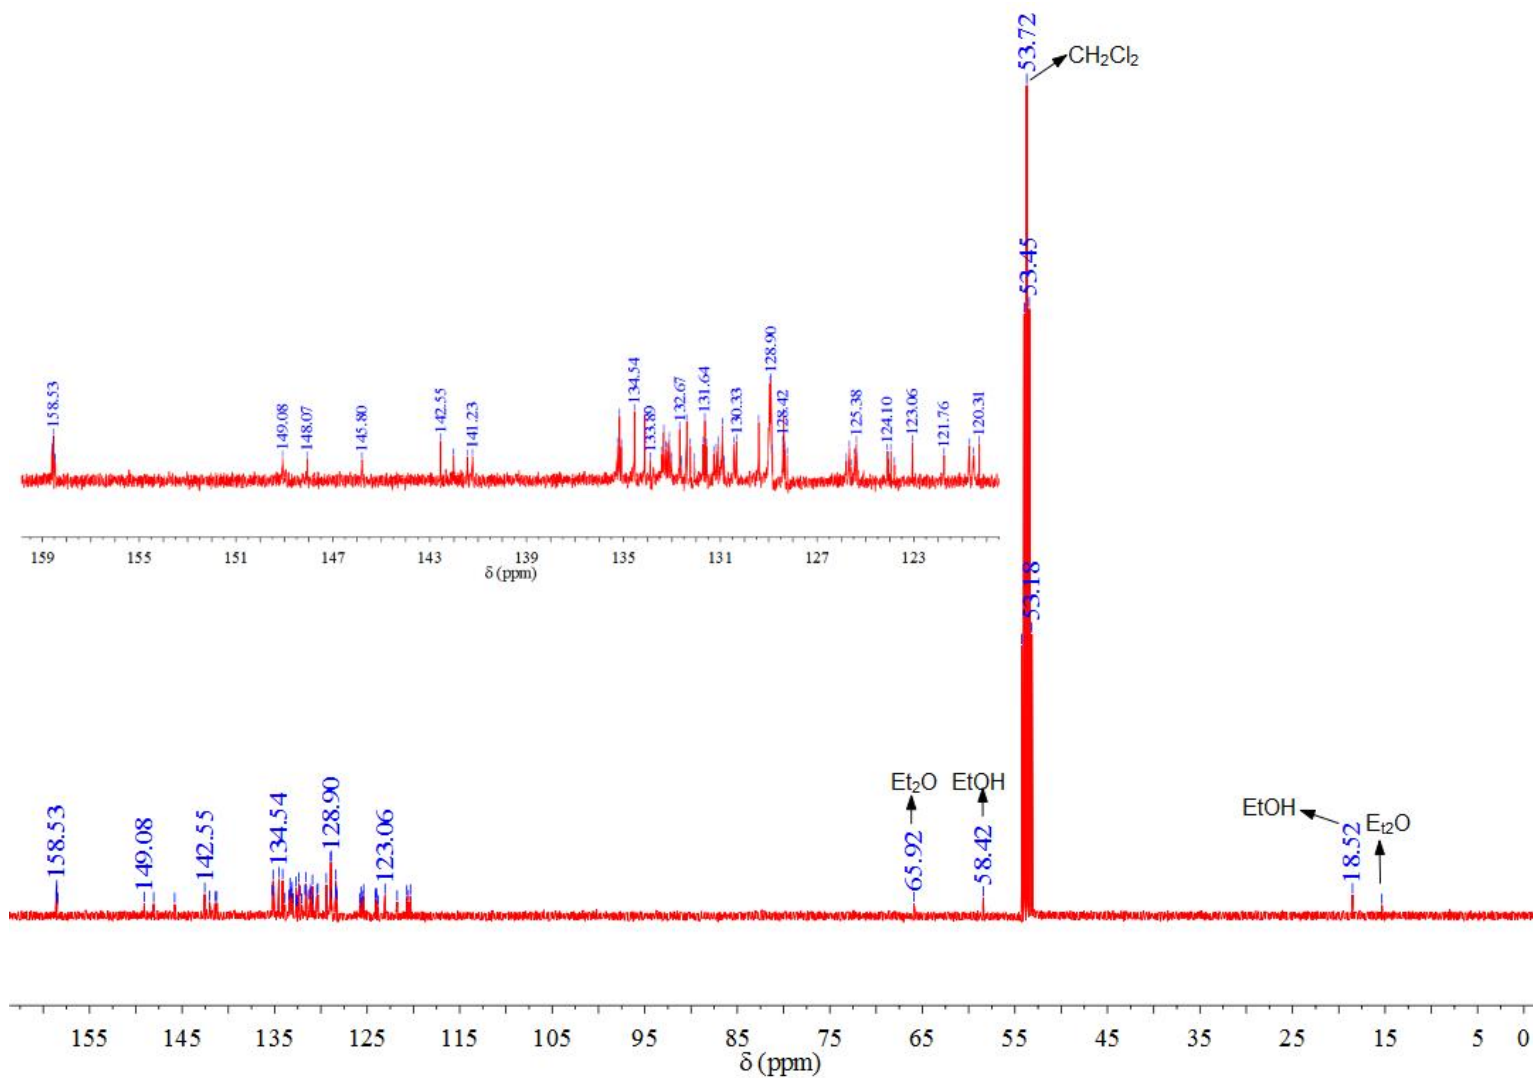

Figure S9. <sup>13</sup>C NMR of complex **1a** in CD<sub>2</sub>Cl<sub>2</sub>

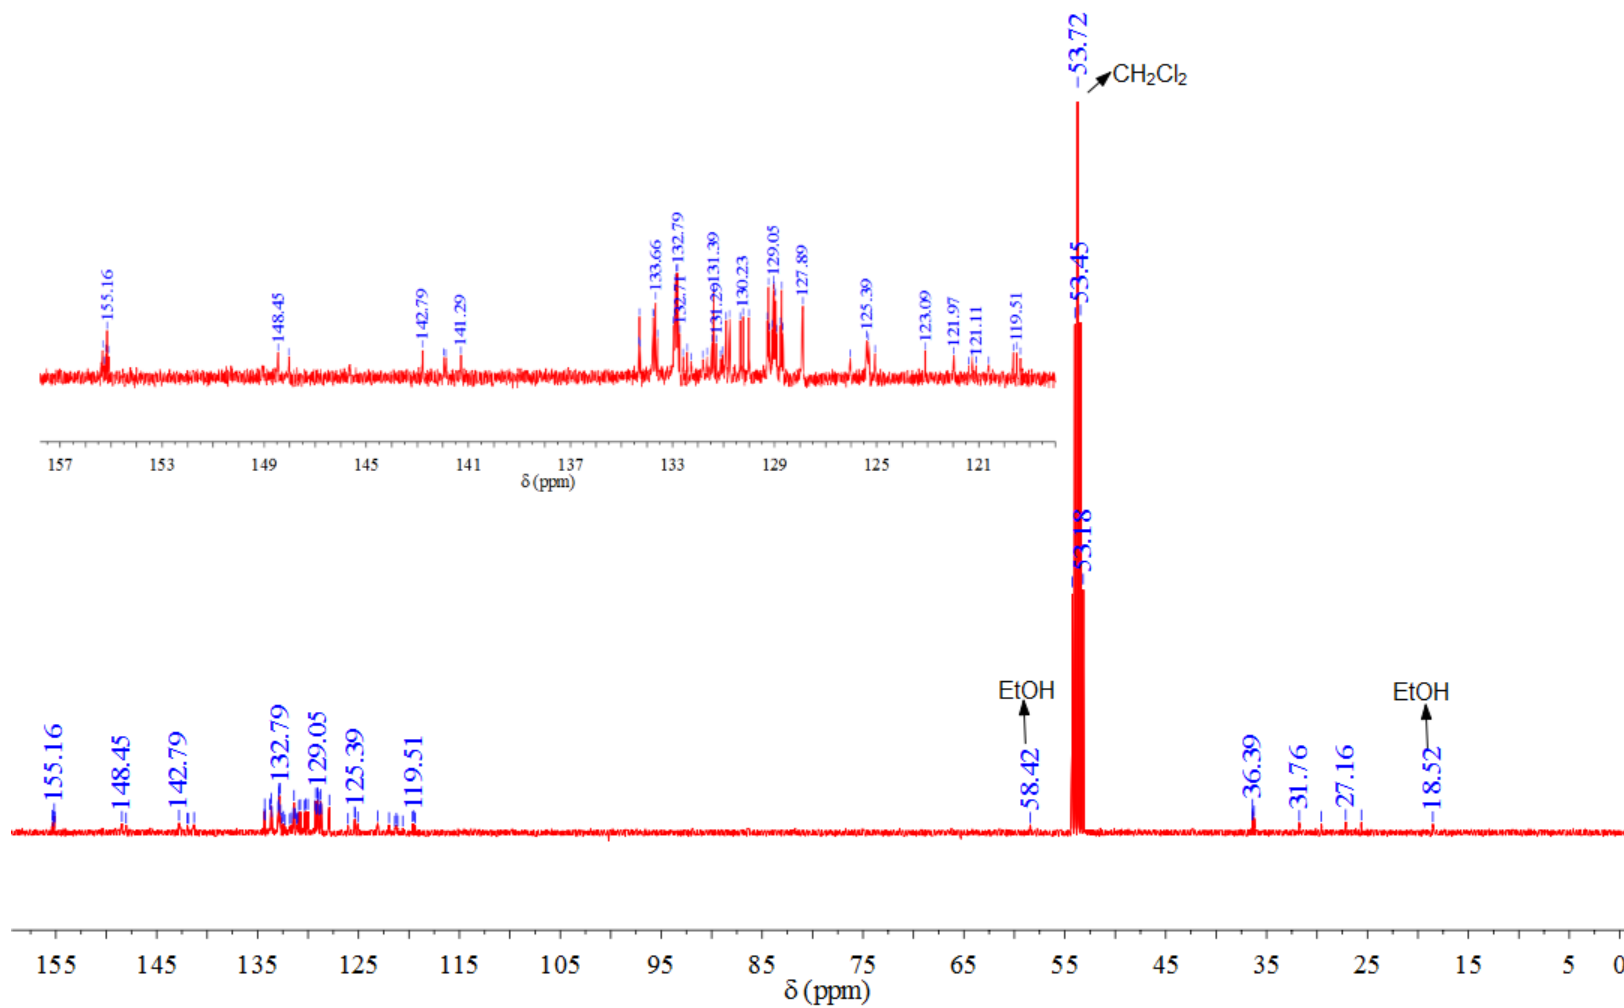

Figure S10.  $^{13}\text{C}$  NMR of complex **2a** in  $\text{CD}_2\text{Cl}_2$

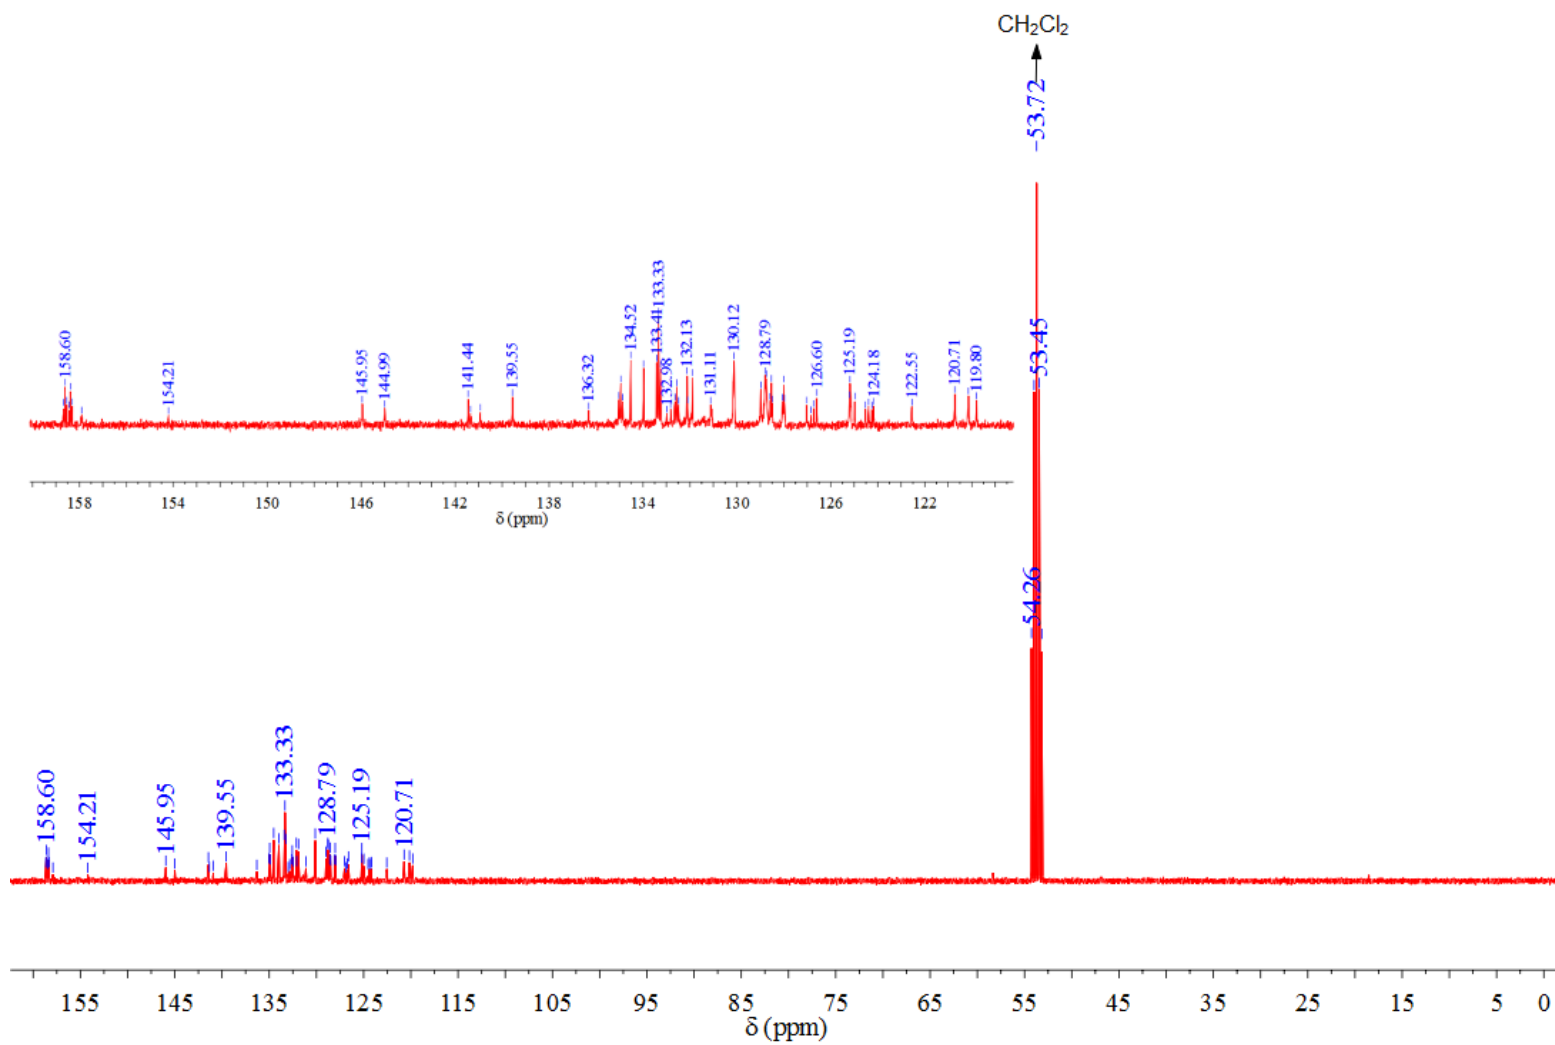Figure S11.  $^{13}\text{C}$  NMR of complex **1b** in  $\text{CD}_2\text{Cl}_2$

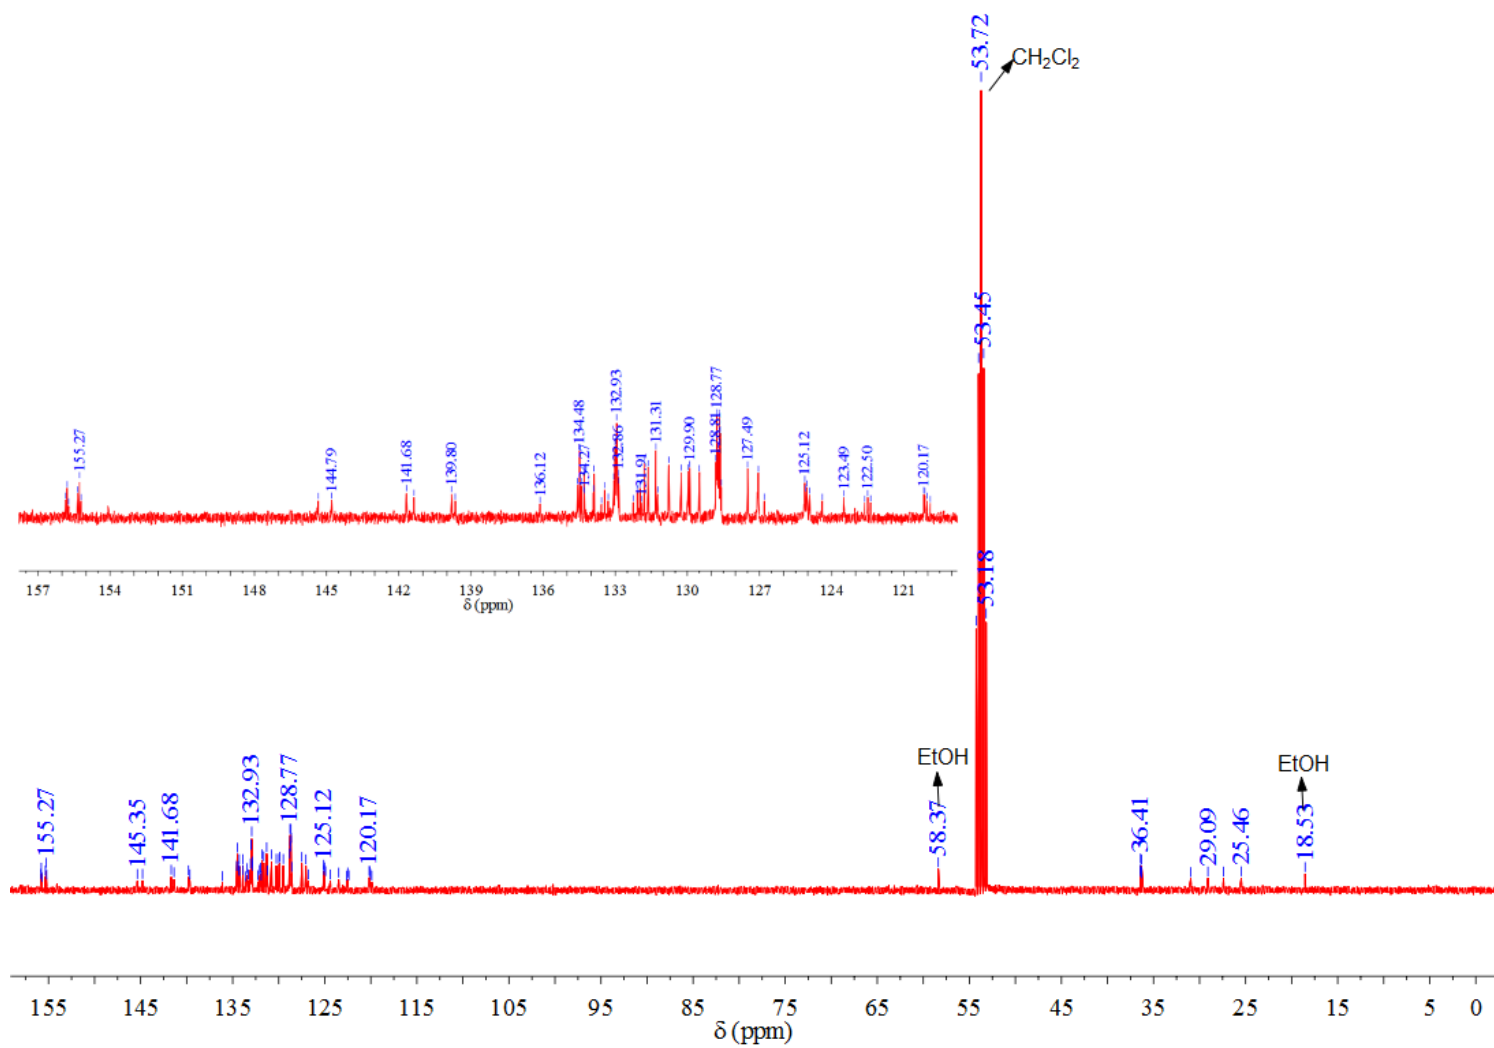

Figure S12.  $^{13}\text{C}$  NMR of complex **2b** in  $\text{CD}_2\text{Cl}_2$



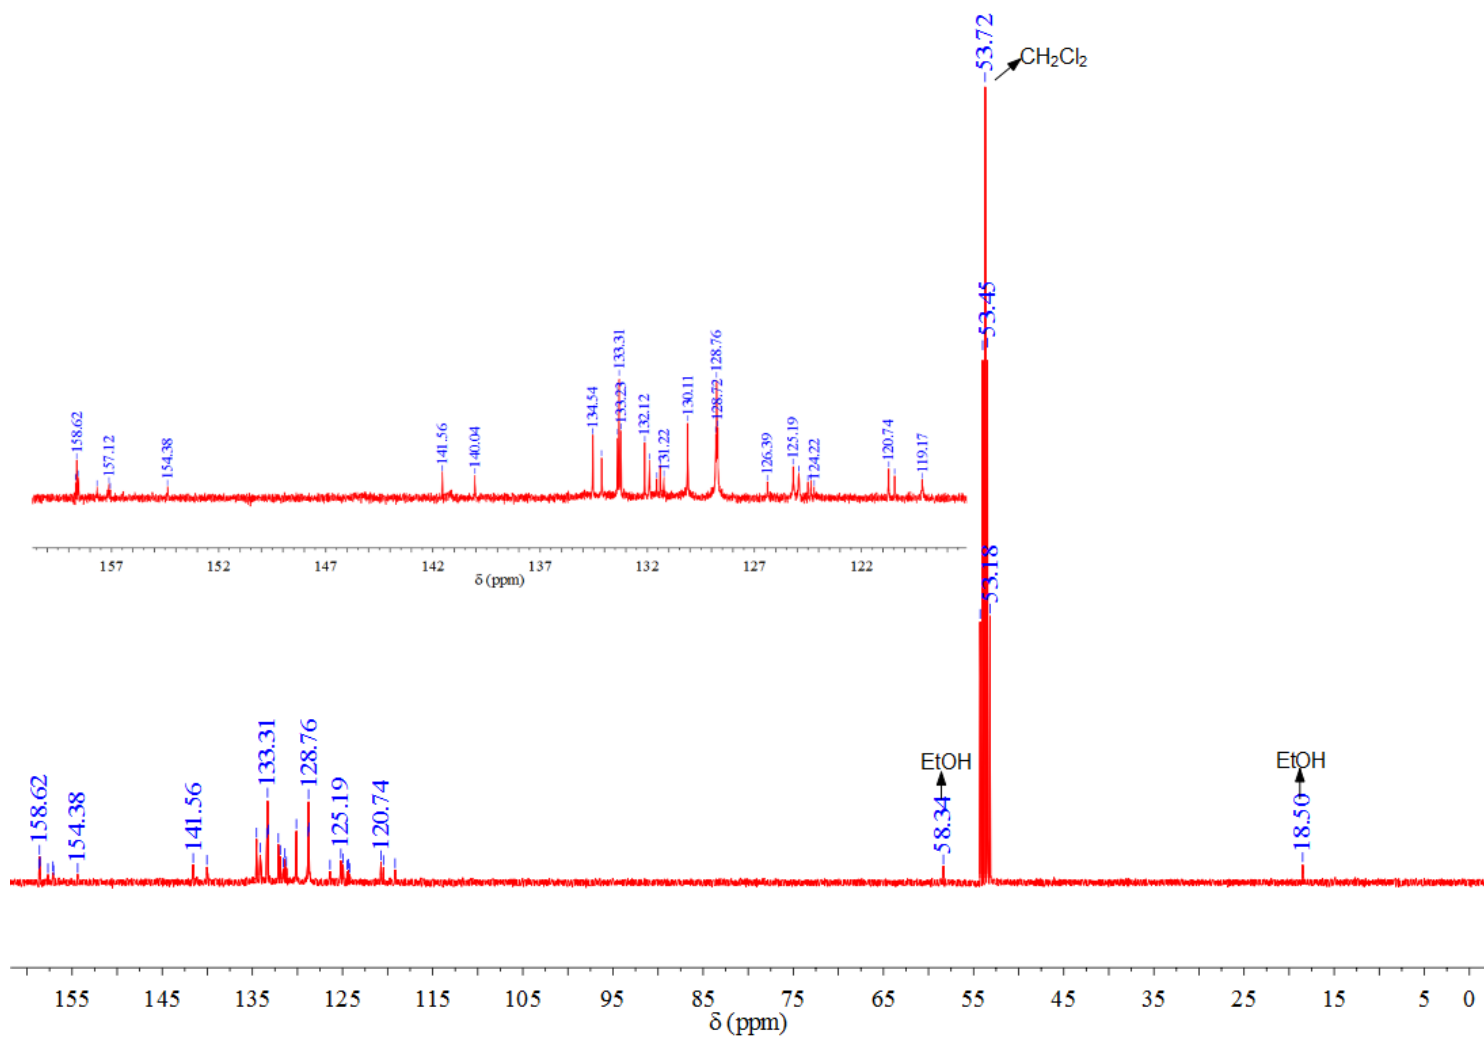Figure S13.  $^{13}\text{C}$  NMR of complex **1c** in  $\text{CD}_2\text{Cl}_2$

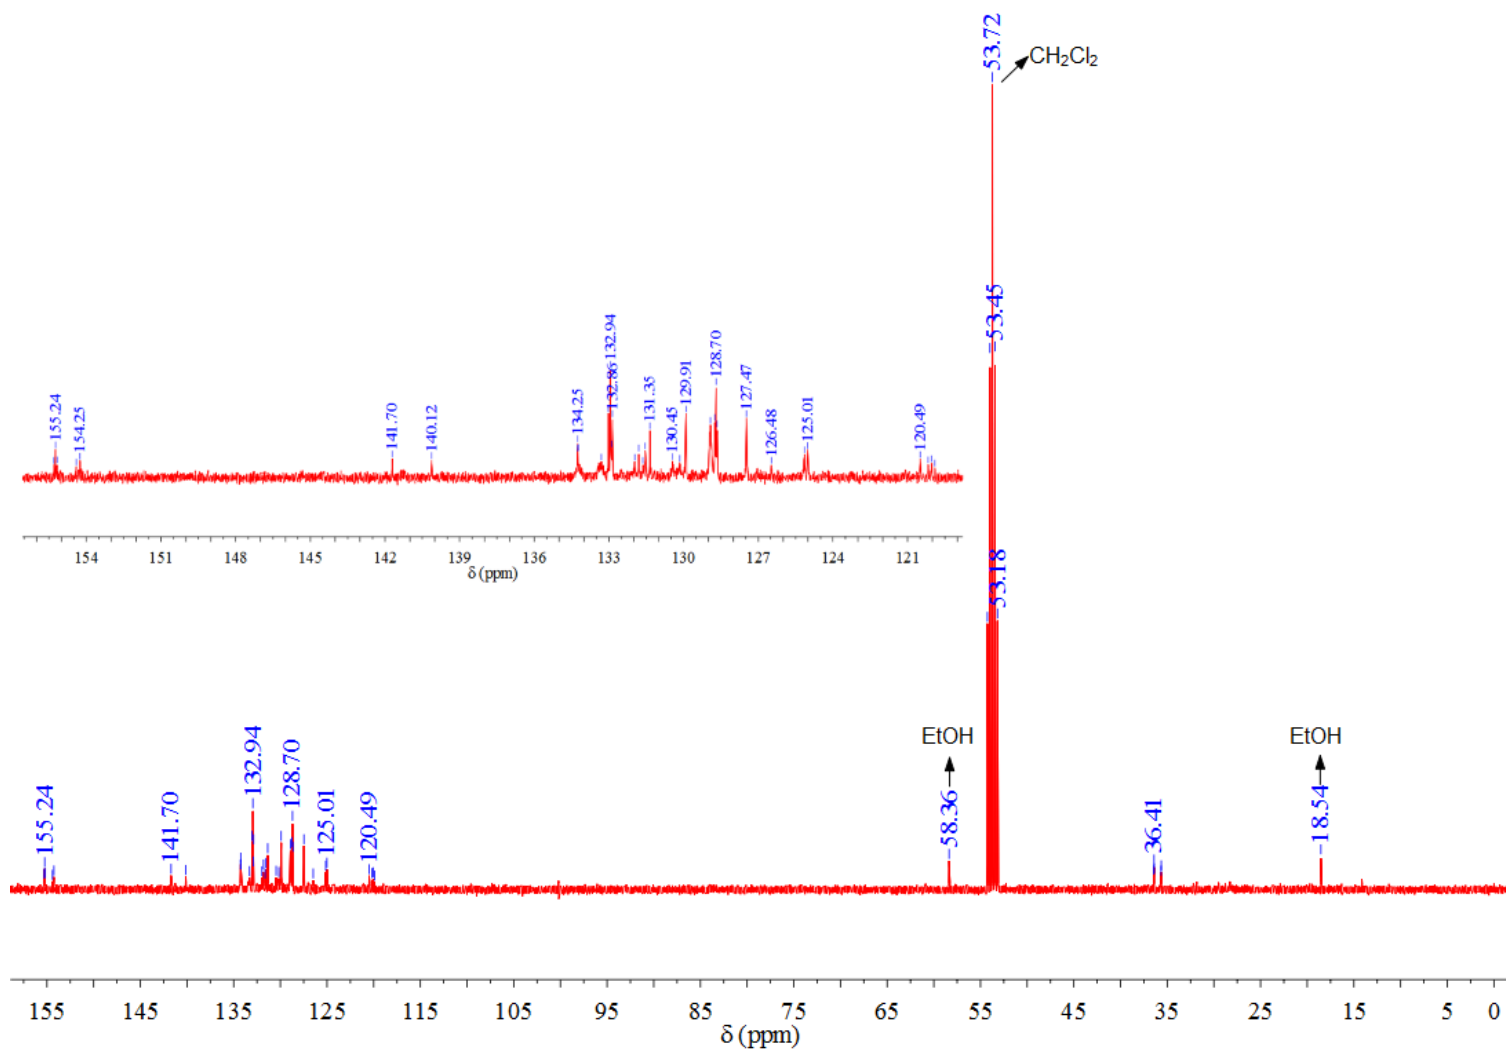

Figure S14.  $^{13}\text{C}$  NMR of complex **2c** in  $\text{CD}_2\text{Cl}_2$

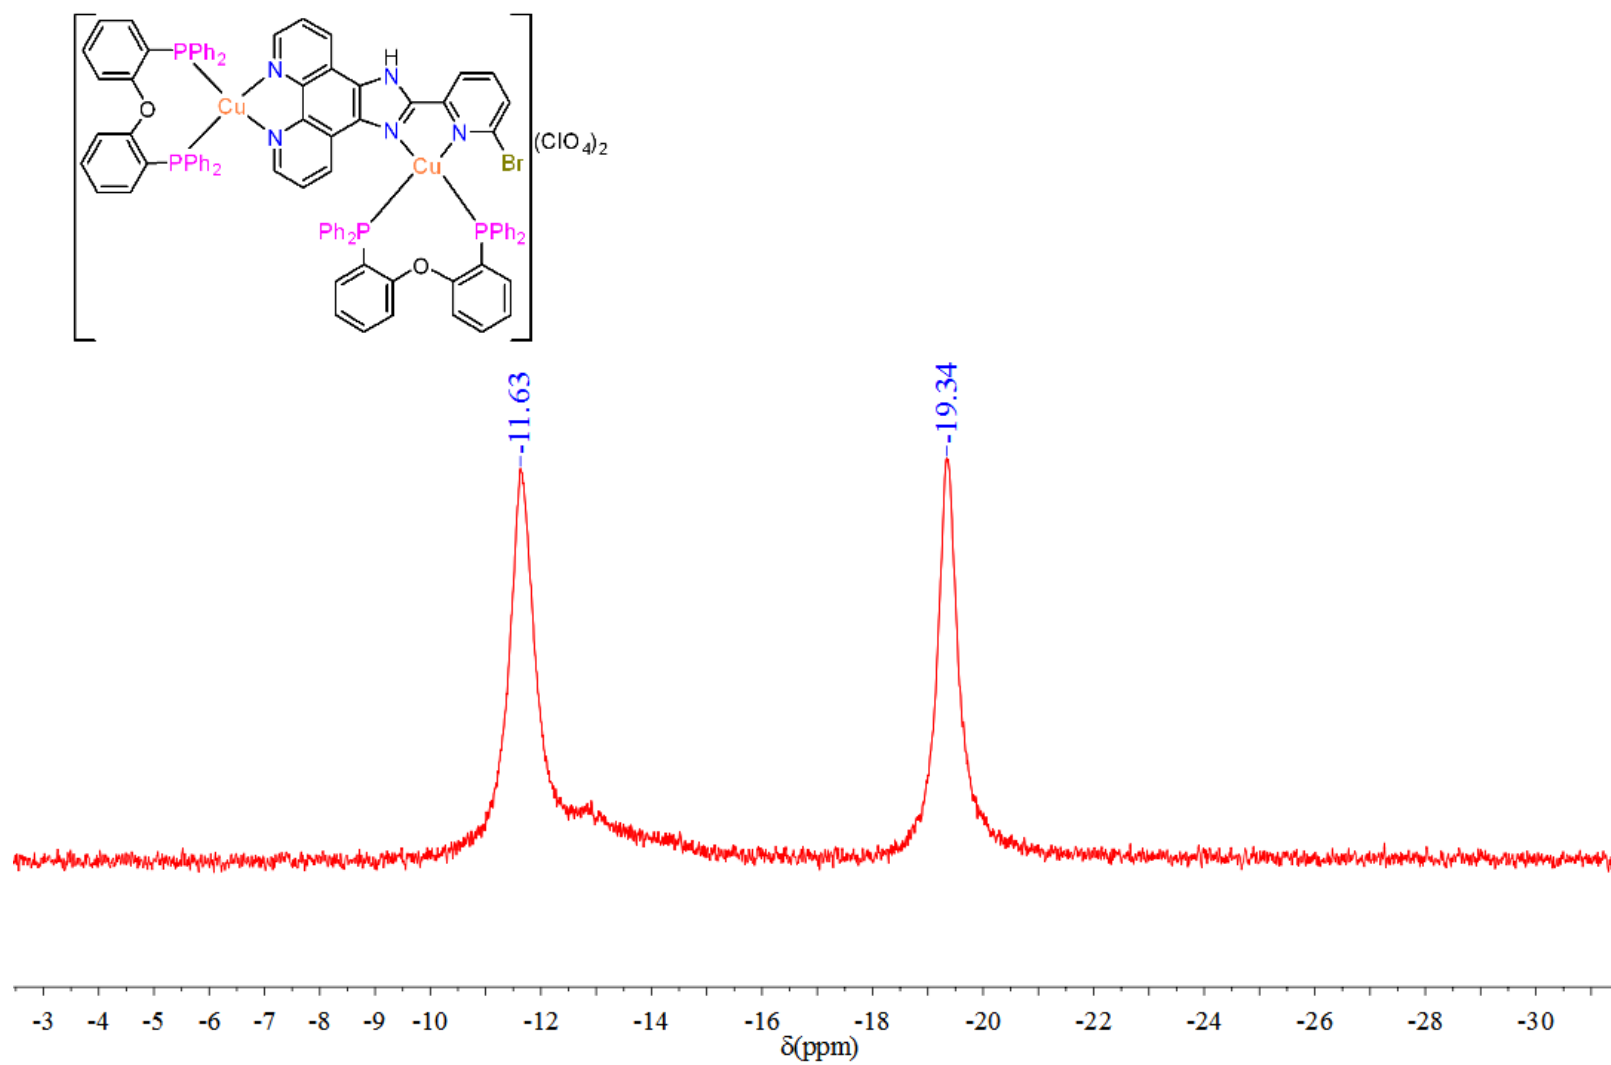

Figure S15.  $^{31}\text{P}$   $\{^1\text{H}\}$  NMR of complex **1a** in DMSO-*d*<sub>6</sub>

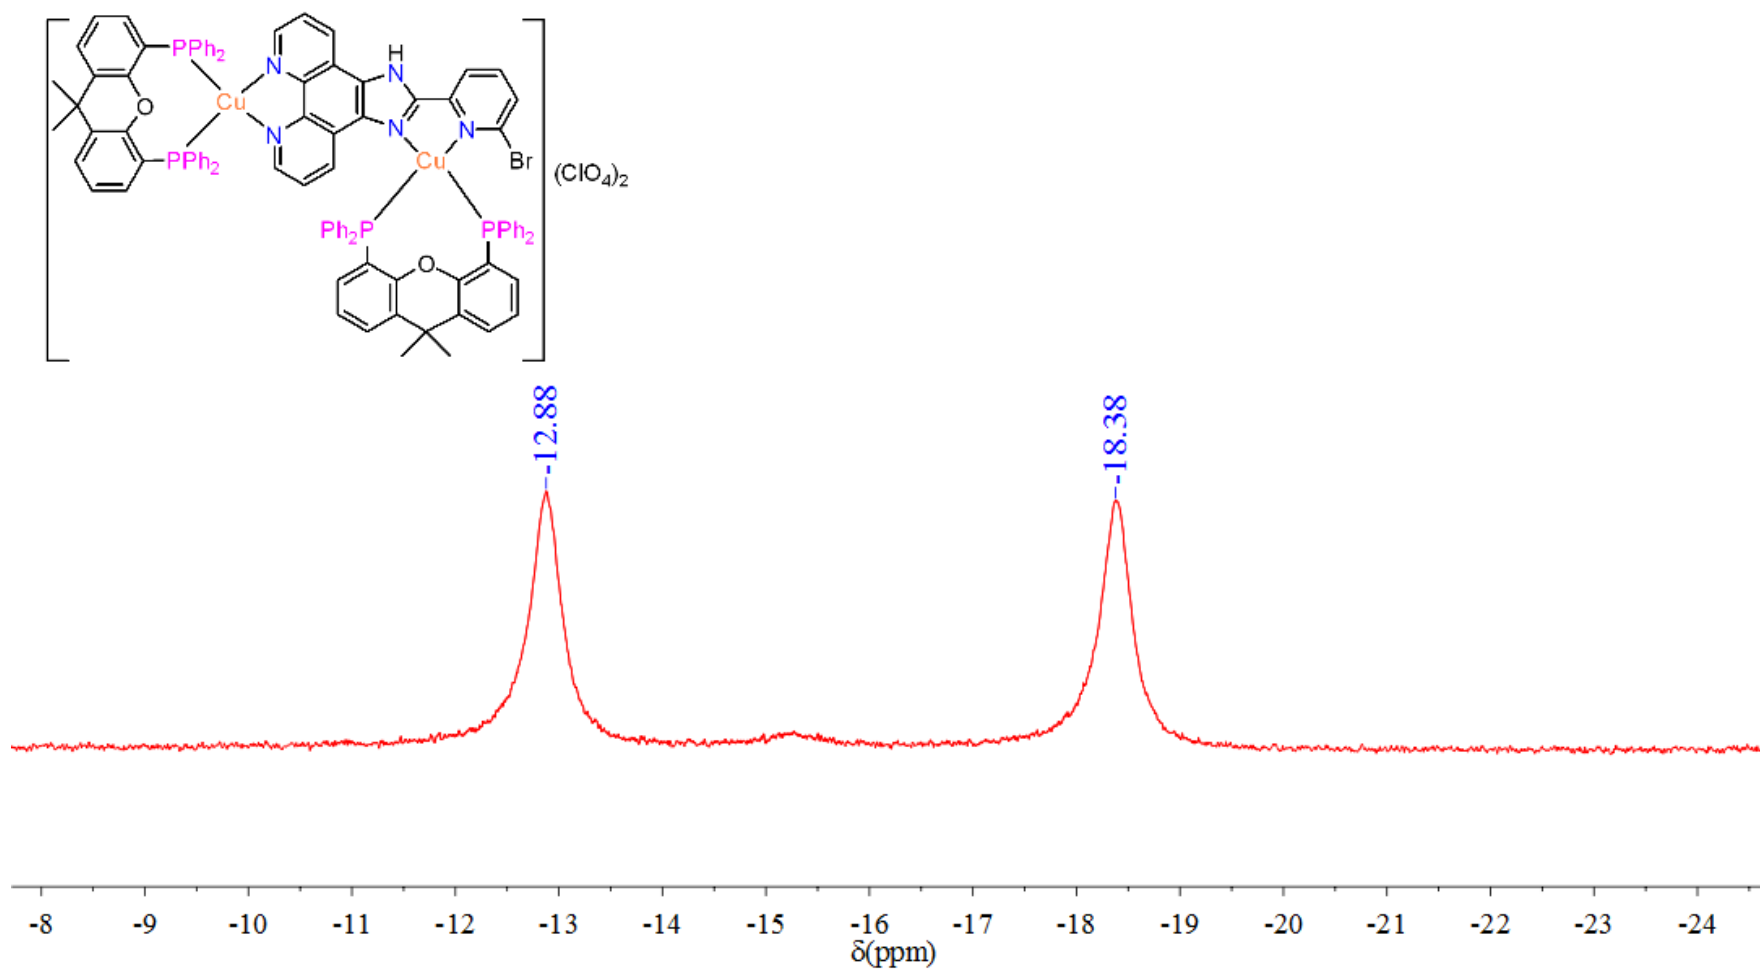

Figure S16.  $^{31}\text{P}$   $\{^1\text{H}\}$  NMR of complex **2a** in  $\text{DMSO-}d_6$

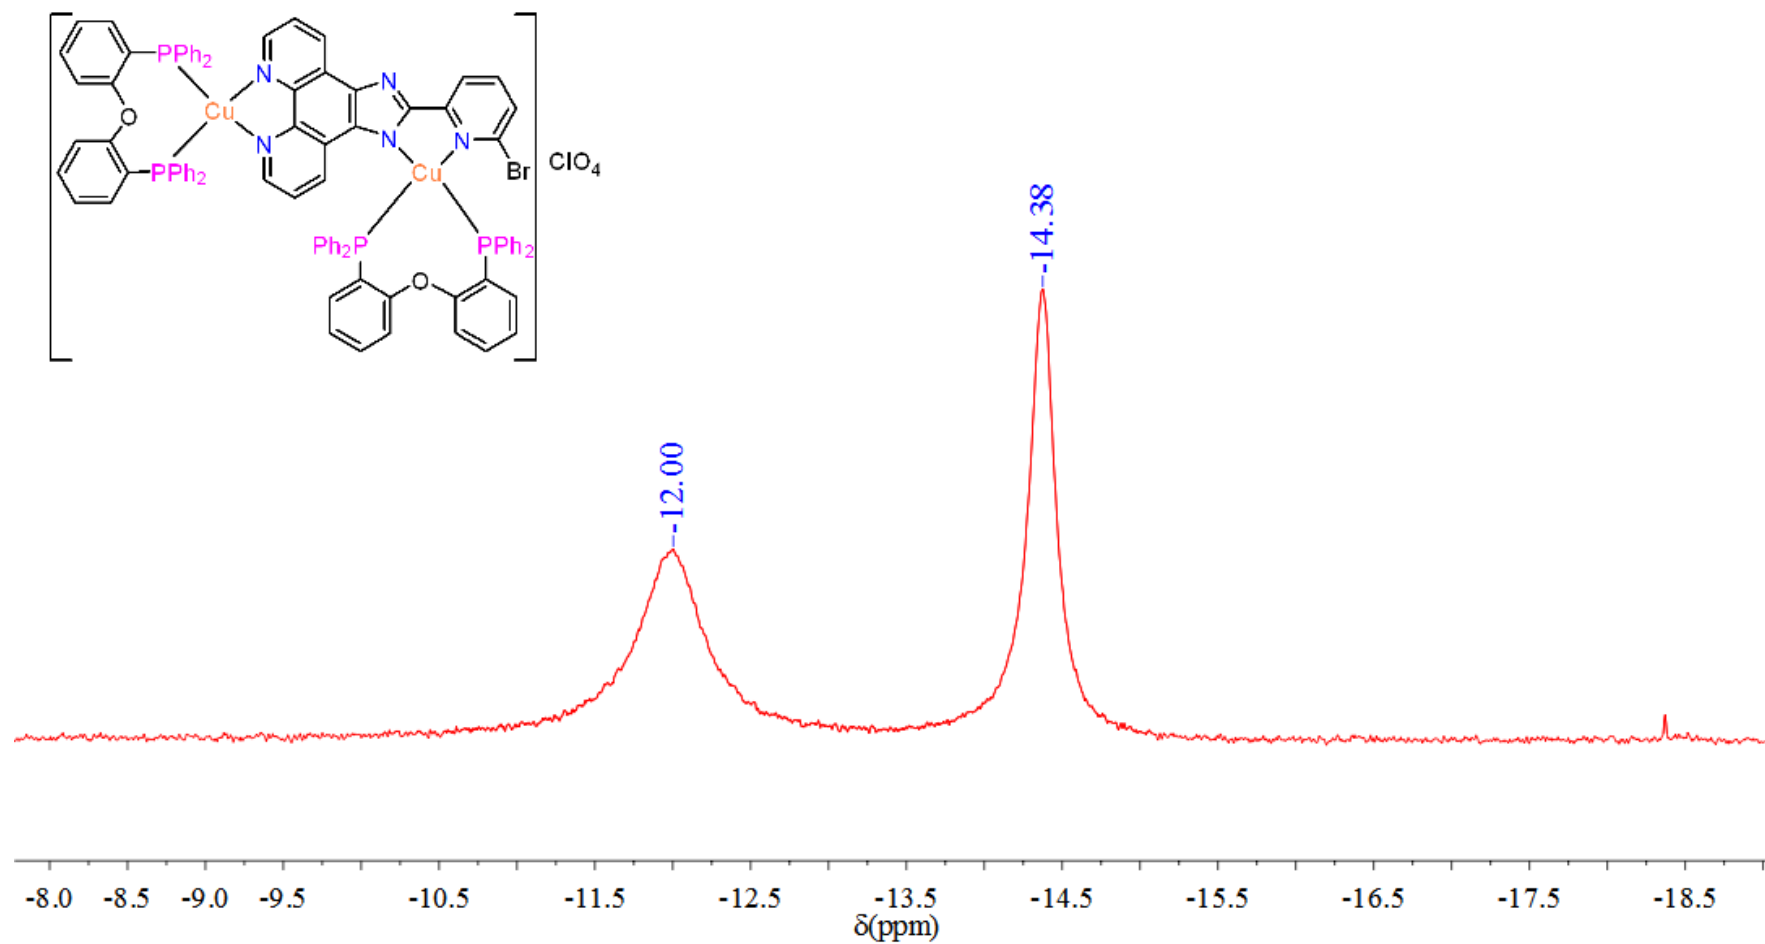

Figure S17.  $^{31}\text{P}$  { $^1\text{H}$ } NMR of complex **1b** in  $\text{DMSO-}d_6$

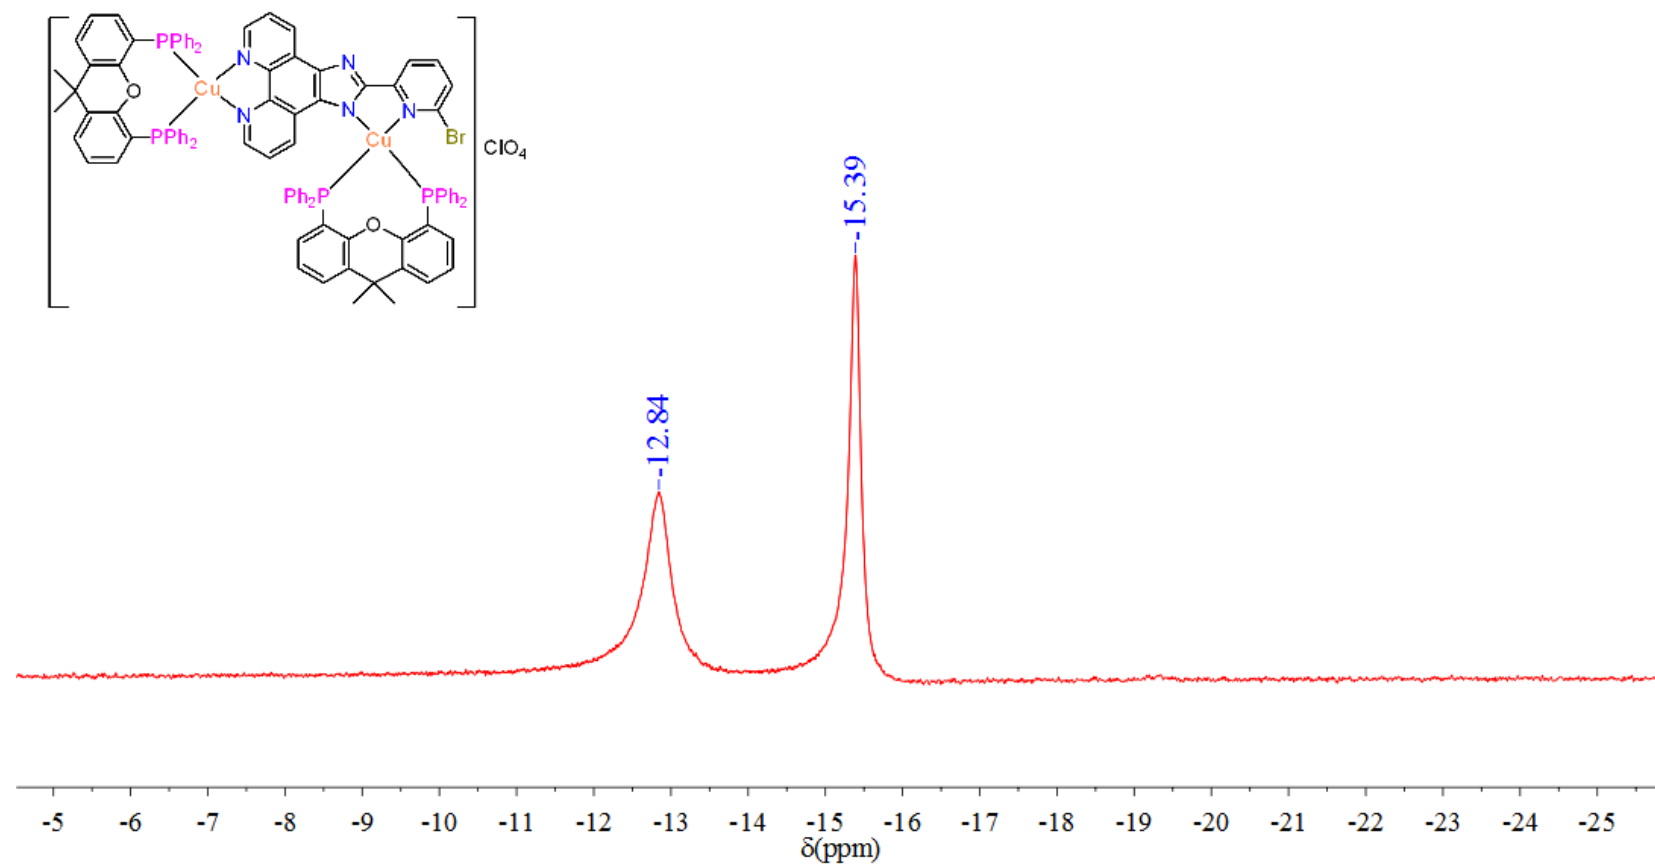

Figure S18.  $^{31}\text{P}$   $\{^1\text{H}\}$  NMR of complex **2b** in  $\text{DMSO-}d_6$

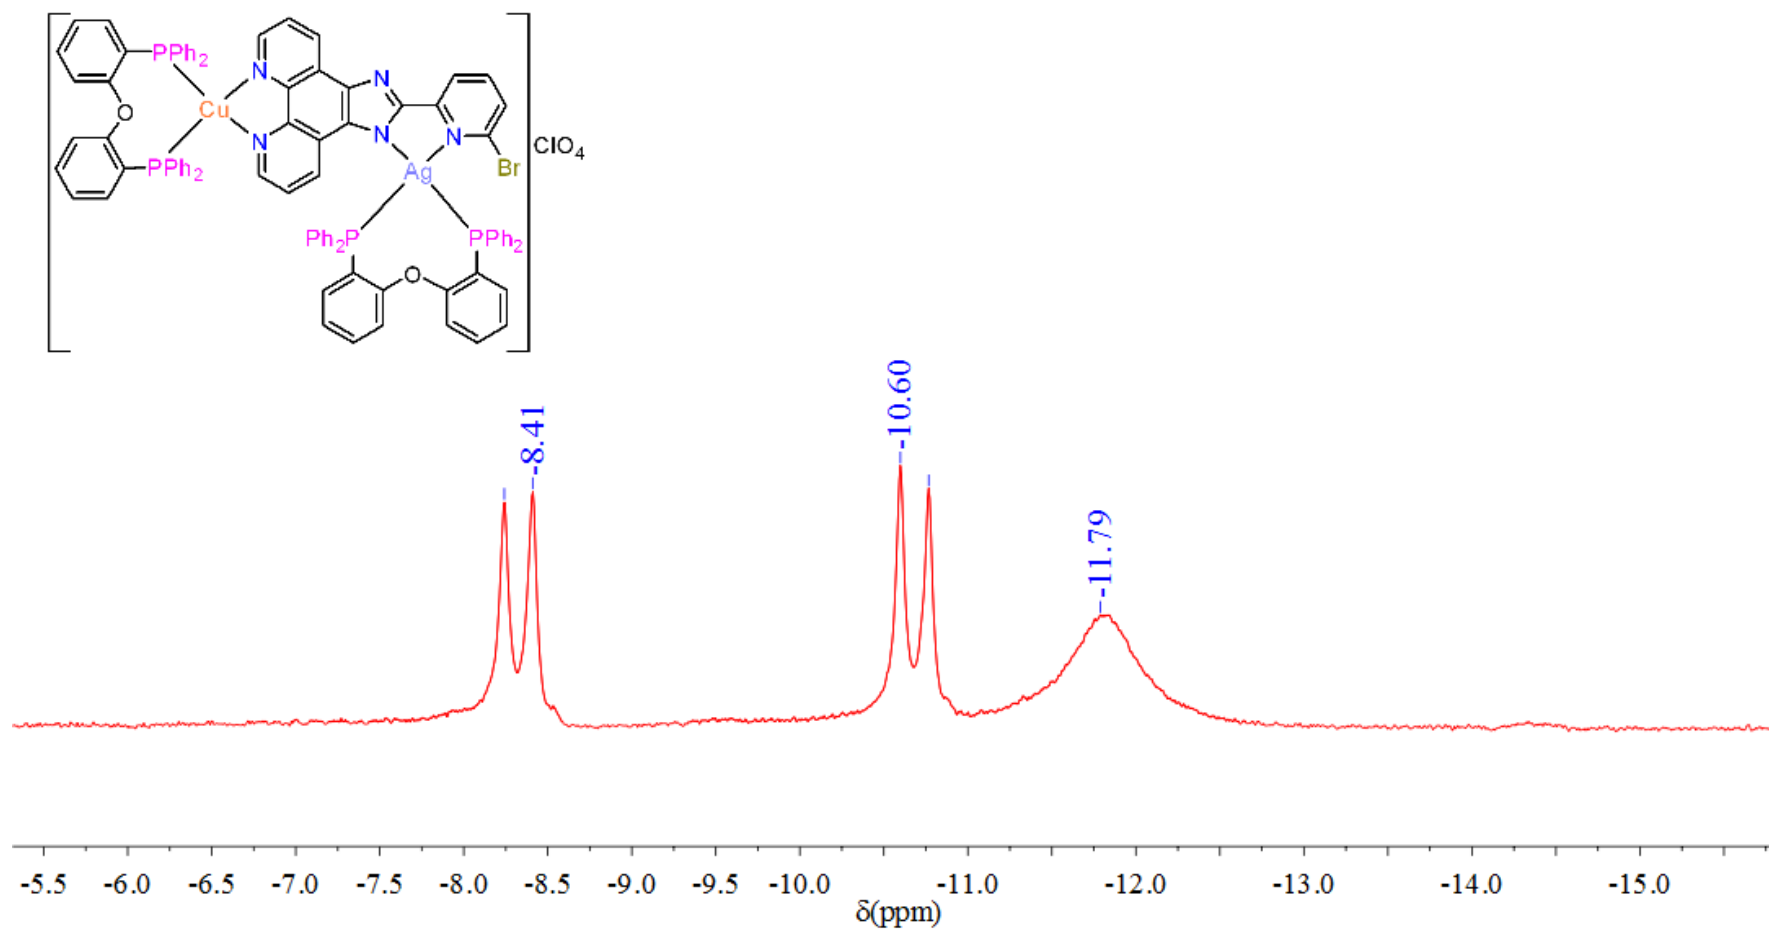

Figure S19.  $^{31}\text{P}$   $\{^1\text{H}\}$  NMR of complex **1c** in DMSO-*d*<sub>6</sub>

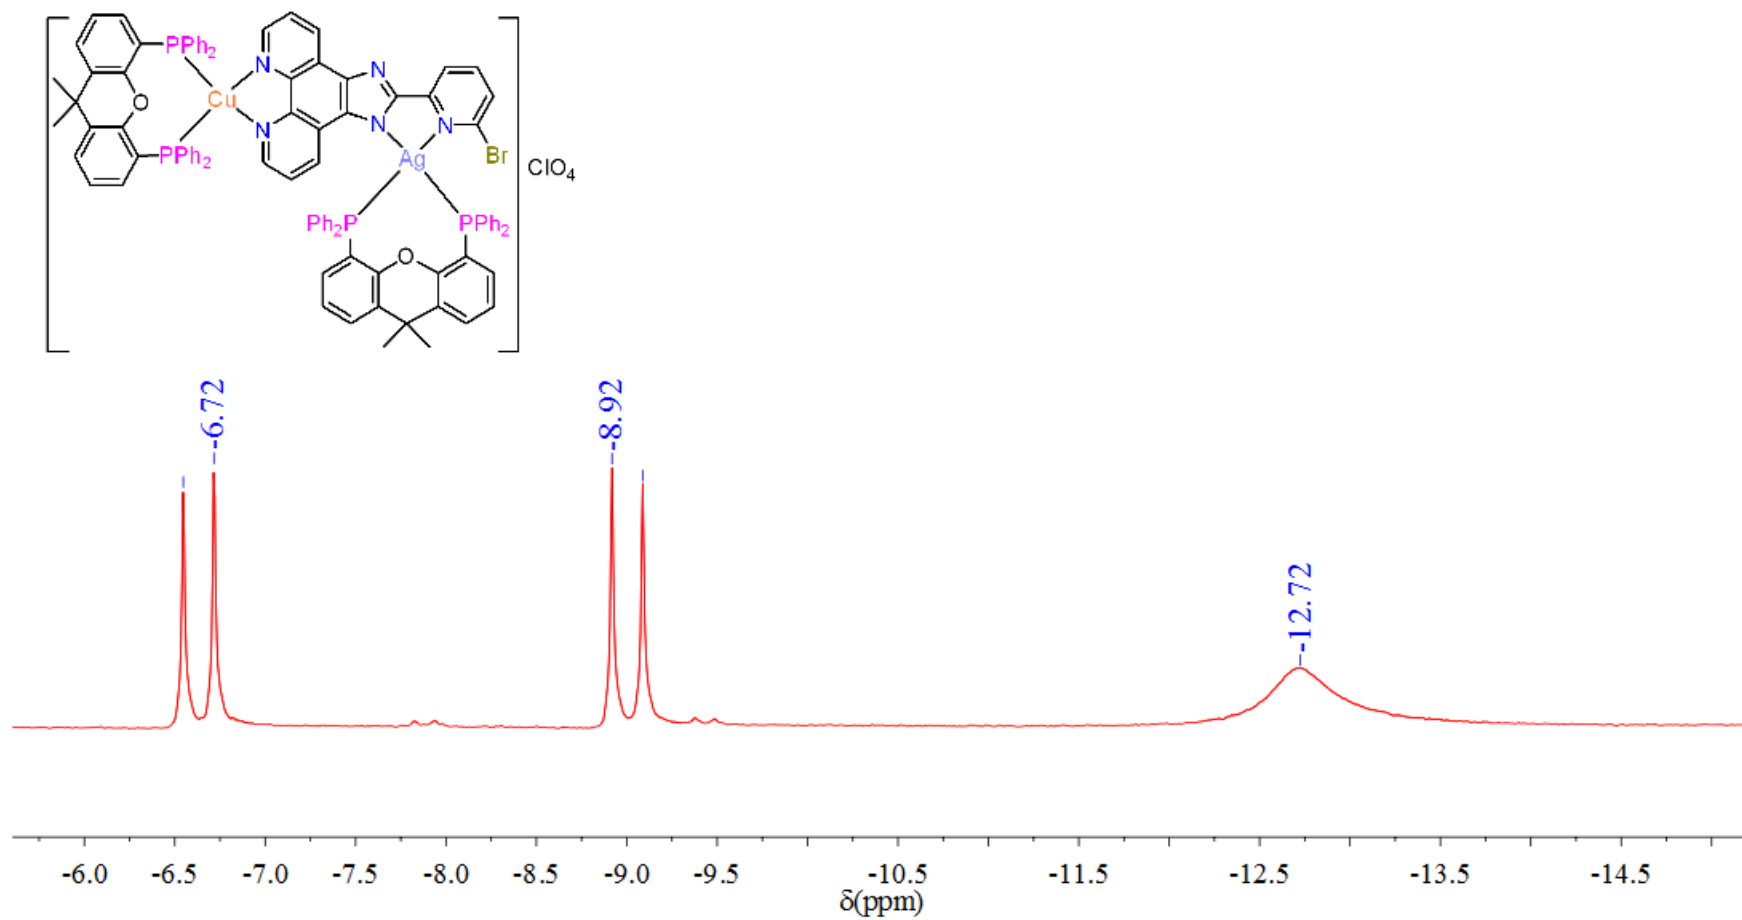

Figure S20.  $^{31}\text{P}$   $\{^1\text{H}\}$  NMR of complex **2c** in  $\text{DMSO-}d_6$



● Spectrum from Data20220318-02-P-1+2-1.wiff (sample 1) - Sample001, Experiment 1, +TOF MS (80 - 5000) from 0.094 to 0.113 min  
 ● C18H11BrN5

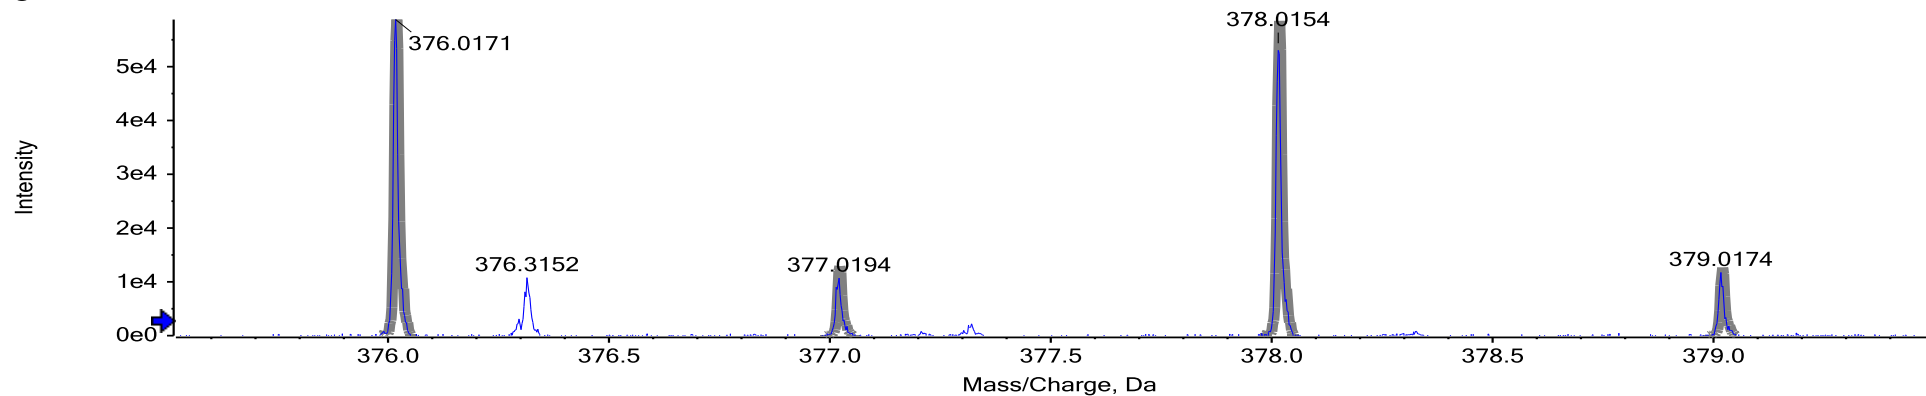

Figure S21. MS spectra of bpipH

Spectrum from Data20220318-02-P-1+2-2.wiff (sample 1) - Sample002, Experiment 1, +TOF MS (80 - 5000) from 0.103 min

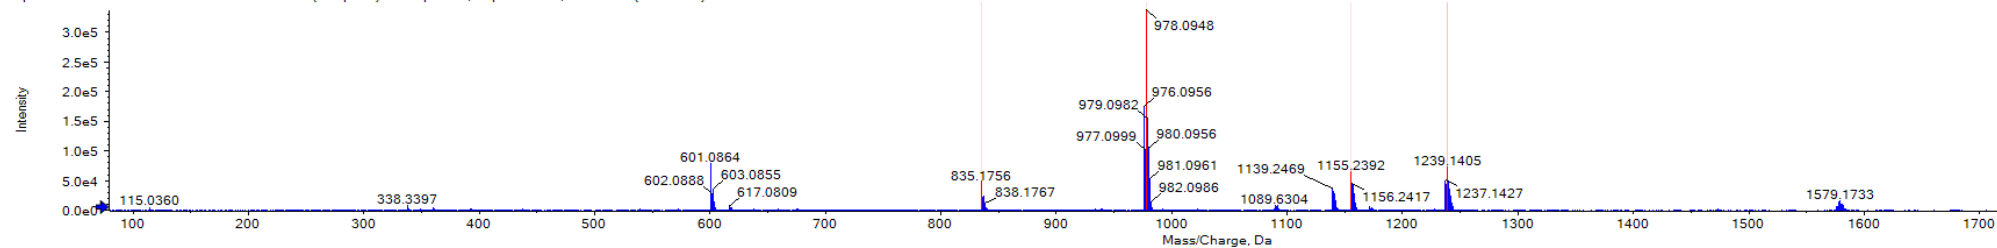

Spectrum from Data20220318-02-P-1+2-2.wiff (sample 1) - Sample002, Experiment 1, +TOF MS (80 - 5000) from 0.103 min

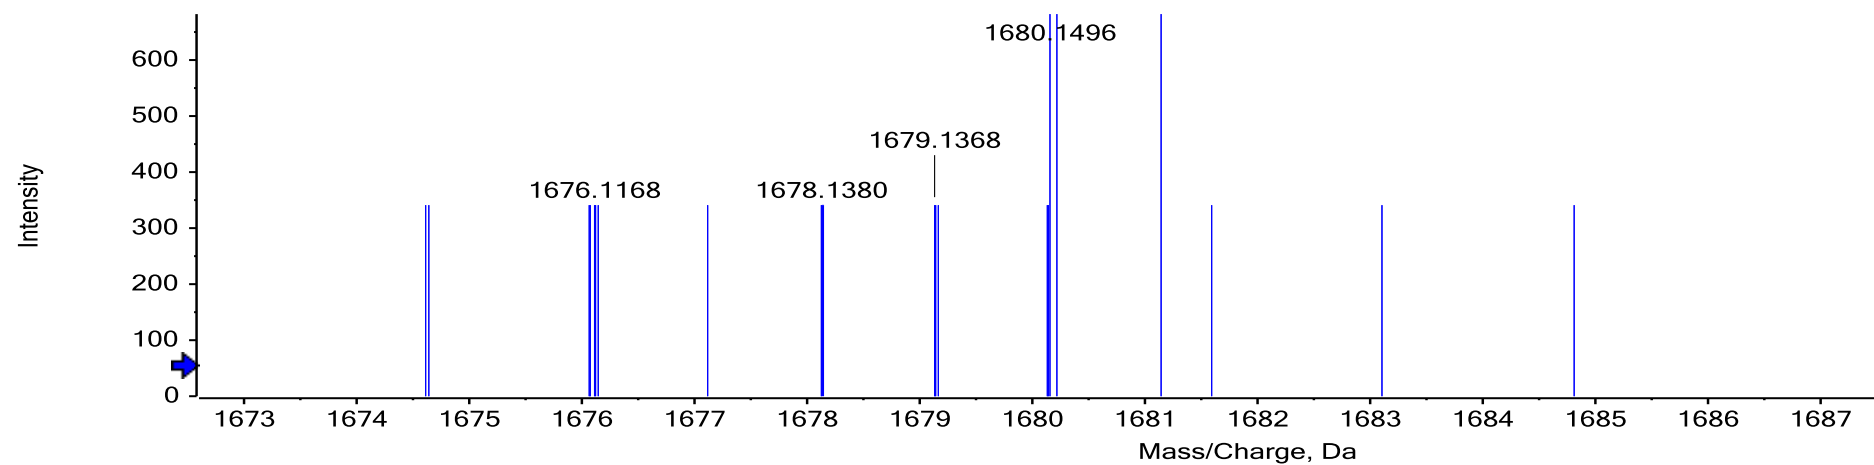

Spectrum from Data20220318-02-P-1+2-2.wiff (sample 1) - Sample002, Experiment 1, +TOF MS (80 - 5000) from 0.122 min

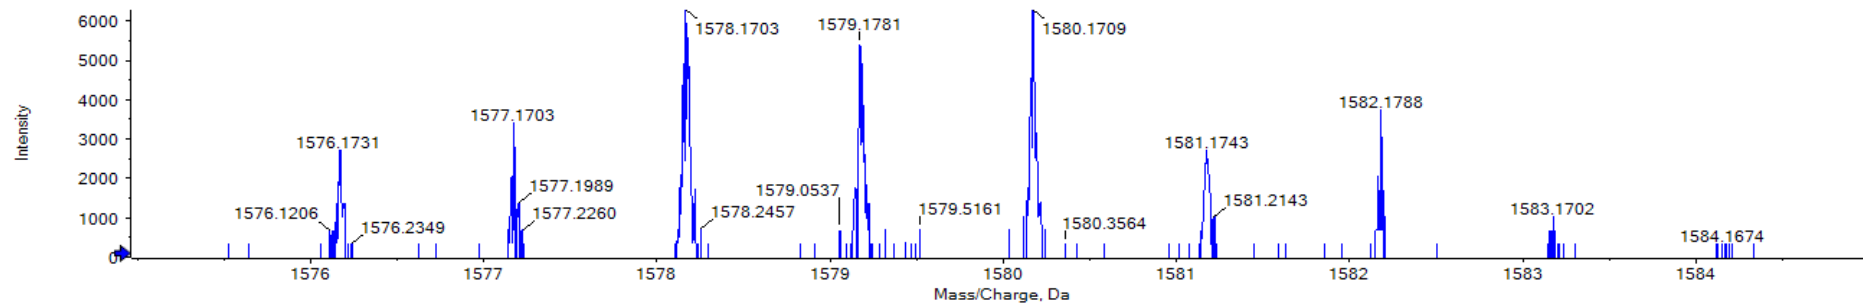

Figure S22. MS spectra of complex **1a**

Spectrum from Data20220318-P-3.wiff (sample 1) - Sample003, Experiment 1, -TOF MS (80 - 5000) from 0.103 min

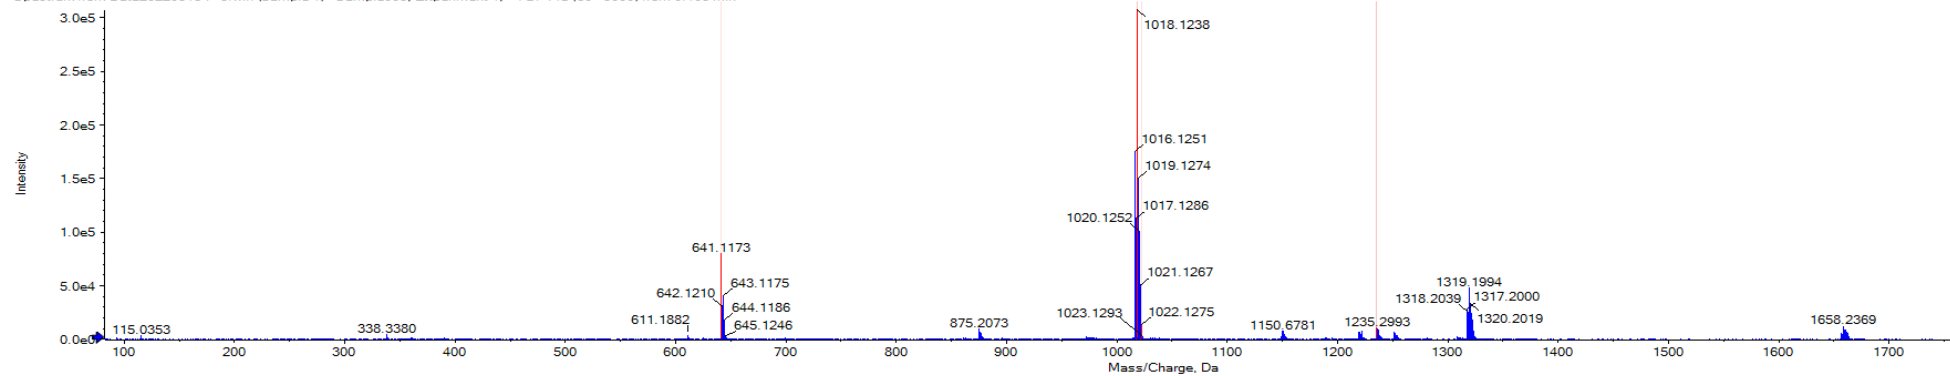

Spectrum from Data20220318-P-3.wiff (sample 1) - Sample003, Experiment 1, +TOF MS (80 - 5000) from 0.103 min

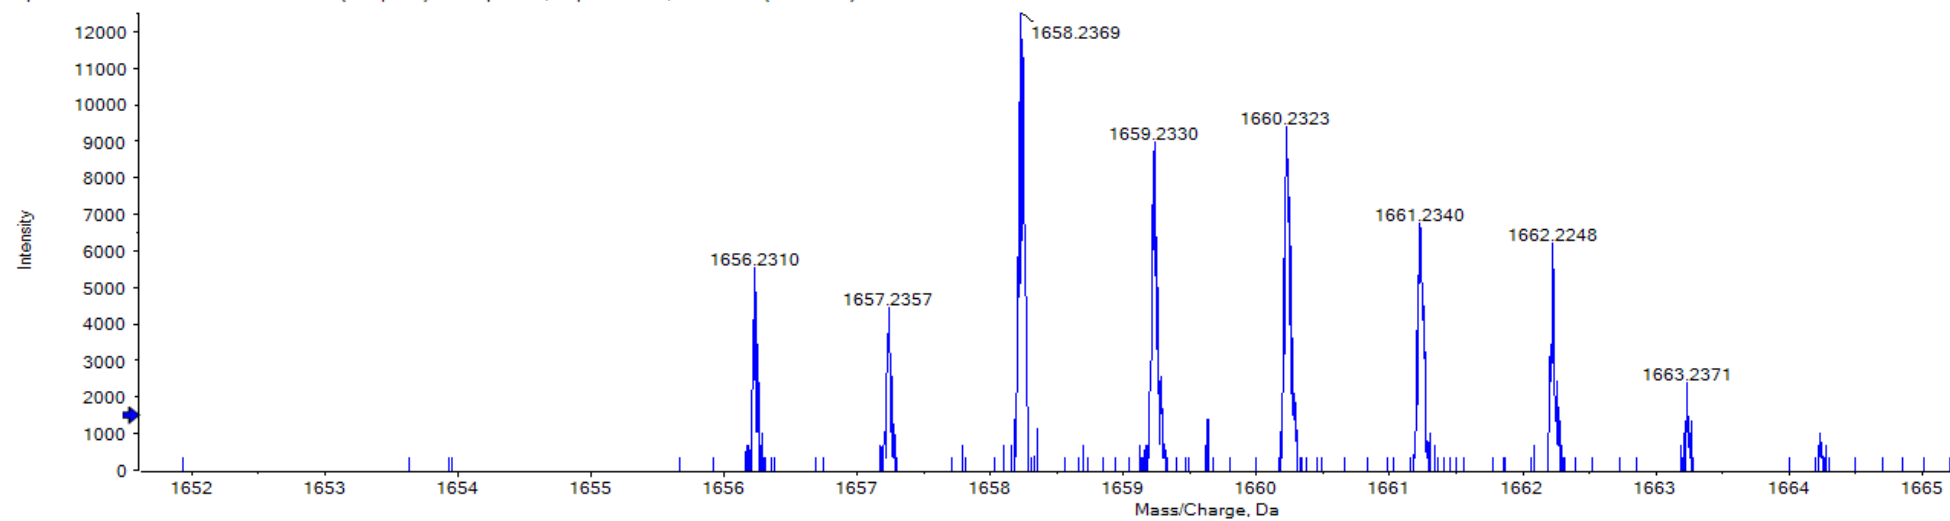

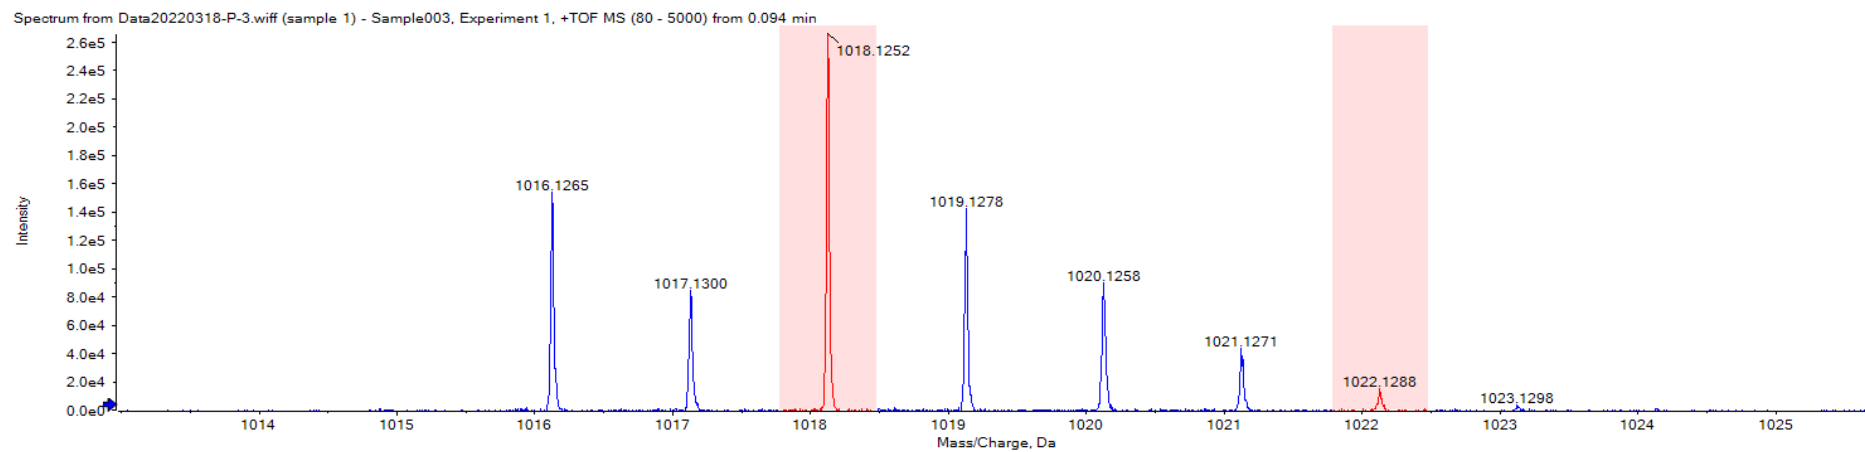

Figure S23. MS spectra of complex **2a**

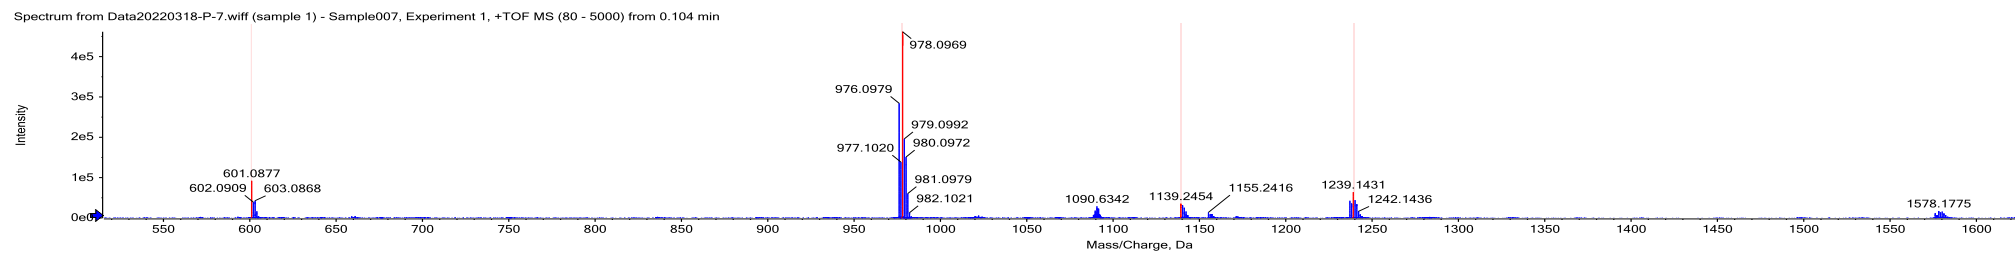

Figure S24. MS spectra of complex **1b**

Spectrum from Data20220318-P-6.wiff (sample 1) - Sample006, Experiment 1, +TOF MS (80 - 5000) from 0.094 min

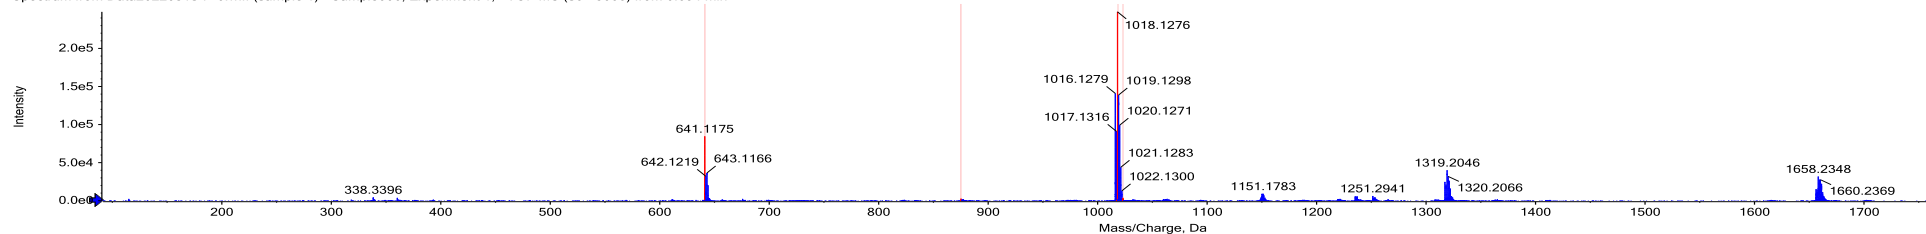

Figure S25. MS spectra of complex **2b**

Spectrum from Data20220318-P-8~13-5.wiff (sample 1) - Sample005, Experiment 1, +TOF MS (80 - 5000) from 0.103 min

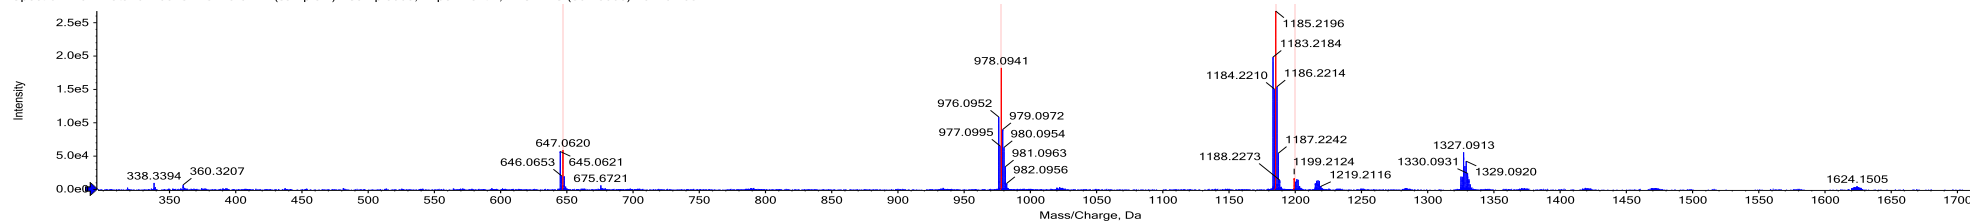

Figure S26. MS spectra of complex **1c**

Spectrum from Data20220318-P-8~13-6.wiff (sample 1) - Sample006, Experiment 1, +TOF MS (80 - 5000) from 0.063 min

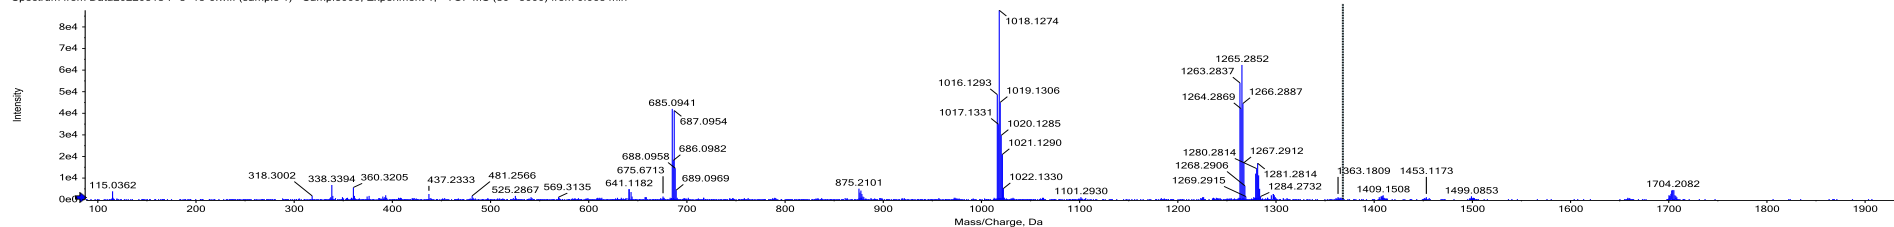

Figure S27. MS spectra of complex **2c**
